# Supplementary material for: Why do clinicians not refer patients to online decision support tools? Interviews with front line clinics in the NHS
Source: PubMed Central journal article supplement — BMJ Open. 2012 Dec 1;2(6):e001530. doi: 10.1136/bmjopen-2012-001530 (PMC3532981; doi:10.1136/bmjopen-2012-001530), 2012-12-01
Supplement: bmjopen-2012-001530.draft_revisions.pdf [file bmjopen-2012-001530.draft_revisions.pdf]

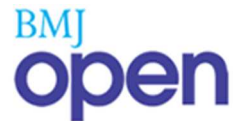

**Why don't NHS healthcare professionals recommend patients use web-based decision support tools? Interviews from the front line.**

|                                 |                                                                                                                                                                                                                                                                                                                                                                   |
|---------------------------------|-------------------------------------------------------------------------------------------------------------------------------------------------------------------------------------------------------------------------------------------------------------------------------------------------------------------------------------------------------------------|
| Journal:                        | <i>BMJ Open</i>                                                                                                                                                                                                                                                                                                                                                   |
| Manuscript ID:                  | bmjopen-2012-001530                                                                                                                                                                                                                                                                                                                                               |
| Article Type:                   | Research                                                                                                                                                                                                                                                                                                                                                          |
| Date Submitted by the Author:   | 22-May-2012                                                                                                                                                                                                                                                                                                                                                       |
| Complete List of Authors:       | Elwyn, Glyn; Cardiff University, Cochrane Institute of Primary Care and Public Health<br>Rix, Andrew; Cardiff University, Cochrane Institute of Primary Care and Public Health<br>Holt, Tom; Cardiff University, Cochrane Institute of Primary Care and Public Health<br>Jones, Deborah; Cardiff University, Cochrane Institute of Primary Care and Public Health |
| <b>Primary Subject Heading</b>: | Evidence based practice                                                                                                                                                                                                                                                                                                                                           |
| Secondary Subject Heading:      | Communication, Evidence based practice, Health services research, Patient-centred medicine                                                                                                                                                                                                                                                                        |
| Keywords:                       | QUALITATIVE RESEARCH, Quality in health care < HEALTH SERVICES ADMINISTRATION & MANAGEMENT, Health service research, shared decision making, decision support interventions, patient decision aids                                                                                                                                                                |
|                                 |                                                                                                                                                                                                                                                                                                                                                                   |

SCHOLARONE™  
Manuscripts

1  
2  
3 **Why don't NHS healthcare professionals recommend patients use web-based decision support**  
4 **tools? Interviews from the front line.**  
5

6 Glyn Elwyn, Andrew Rix, Tom Holt, Deborah Jones  
7  
8  
9  
10

11 **Cochrane Institute of Primary Care and Public Health**  
12 **Neuadd Meirionydd**  
13 **School of Medicine**  
14 **Cardiff University**  
15 **Heath Park**  
16 **United Kingdom**  
17 **CF14 4YS**  
18  
19

20 Glyn Elwyn, professor, [elwyn@cardiff.ac.uk](mailto:elwyn@cardiff.ac.uk)

21 Andrew Rix, independent researcher, [andrewrixhome@gmail.com](mailto:andrewrixhome@gmail.com)

22 Tom Holt, independent researcher, [tbholt1@gmail.com](mailto:tbholt1@gmail.com)

23 Deborah Jones, independent researcher, [deb.jns64@gmail.com](mailto:deb.jns64@gmail.com)  
24  
25  
26

27 **Address for correspondence:** Glyn Elwyn - [glynelwyn@gmail.com](mailto:glynelwyn@gmail.com)  
28  
29

30 **Keywords:** patient decision support, decision aids, shared decision making, patient centred care,  
31 informed consent.  
32

33 The Corresponding Author has the right to grant on behalf of all authors and does grant on behalf of all  
34 authors, an exclusive licence (or non exclusive for government employees) on a worldwide basis to the  
35 BMJ Publishing Group Ltd to permit this article (if accepted) to be published in BMJ editions and any  
36 other BMJ PGL products and sublicences such use and exploit all subsidiary rights, as set out in our  
37 licence.

38 All authors have completed the Unified Competing Interest form

39 [http://www.icmje.org/coi\\_disclosure.pdf](http://www.icmje.org/coi_disclosure.pdf) (available on request from the corresponding author) and  
40 declare: no support from any organisation for the submitted work [or describe if any]; no financial  
41 relationships with any organisations that might have an interest in the submitted work in the previous  
42 three years [or describe if any], no other relationships or activities that could appear to have influenced  
43 the submitted work [or describe if any].  
44  
45  
46  
47  
48  
49  
50  
51  
52  
53  
54  
55  
56  
57  
58  
59  
60

## Summary

### Focus

- Research studies demonstrate that engaging patients in the use of decision support (decision aids) is beneficial but take up is low
- Clinicians are in a position to advocate the use of decision support but do not appear to do so.

### Key messages

- Reluctance to point patients in the direction of decision support is based on a complex mixture of professional attitudes, difficulties in incorporating the tools into existing work patterns and competing organisational pressures, such as targets
- This reluctance will not be overcome simply by making more tools available and more accessible
- When appropriately directed, a significant number of patients do use the decision support and say they find them useful.

### Strengths and Limitations

- The evaluation study upon which these results are based set out to explore patterns of usage but turned to examine why take up was lower than expected
- The evidence comes mainly from 57 qualitative interviews with healthcare professionals taking part in the introduction of six web-based decision support tools hosted on the NHS Direct website
- Low take-up reduced the opportunity to obtain evidence from patient users.

## Abstract

**Objective:** To assess whether clinical teams would direct patients to use web-based patient decision support interventions (DESI) and whether patients would use them.

**Design:** Mixed methods using concurrent and retrospective semi-structured interviews, web server log analysis and surveys.

**Participants and settings:** 57 professionals (nurses, doctors and others) in orthopaedic, antenatal, breast, urology clinics and in primary care practices and 10 patients across 22 NHS sites given access to DESIs hosted on the NHS Direct web-site.

**Results:** Fewer than expected patients were directed to use the web tools. Technical problems partly contributed but the low uptake was mainly explained by clinicians' limited understanding of how they should be located in clinical pathways, their perception that 'shared decision making' was already commonplace and that some patients are resistant to being involved in treatment decisions. External factors, such as efficiency targets and 'best practice' recommendations were cited as having a significant negative influence on clinicians' decisions to refer. Clinicians did not feel the need to direct patients to use decision support tools, web-based or not, and, as a result, felt no requirement to change existing routines. However, the data also showed that many patients, when directed to these tools, were willing to access and use them and found them helpful. Uptake is highest when clinicians set expectations that these tools are integral to practice and embed their use into clinical pathways.

**Conclusions:** Evidence of patient benefit from a Cochrane review and making DESIs freely available via the web are not sufficient drivers to guarantee routine use. Changes are needed in attitudes and skills as well as system support to reach organisation-wide agreement about the role of these interventions and their location in clinical pathways.

**Words:** 284

**Article words:** 3153

## Introduction

Are clinical teams willing to ask patients to use decision support interventions, when hosted on the web? A decade of research has demonstrated consistent positive outcomes when patient decision support interventions, often called decision aids, are evaluated in randomised controlled trials (1). Use of these interventions is advocated in order to help achieve shared decision making – where patients and clinicians work together to arrive at decisions that best match the informed patient preference (2). These interventions typically consider clinical situations where there are reasonable alternatives. Typical examples are whether to proceed to a total knee replacement or use alternative treatments or whether to accept or decline an amniocentesis, a procedure that runs the risk of leading to a miscarriage. When these interventions are used, patient knowledge increases, risk perceptions are more accurate, patients feel more actively involved in decisions and often tend to make more conservative choices, especially when considering discretionary surgery (1).

Despite good evidence and policy support, studies have revealed resistance to the implementation of shared decision making and decision support (3). Professionals often hold the view that they 'already do' shared decision making, that the interventions promoted lack applicability to individual patients and that there is insufficient time to involve patients in decisions (4). To date, only a few studies have addressed the use of implementing these interventions in routine clinical settings (5). Many obstacles have been described and it is too early to say whether the benefits observed in randomised trials can be replicated (Francis Légaré et al., 2010). As yet, there has been no large scale study to assess the uptake possible in pragmatic settings (7).

Responding to the potential benefits of shared decision making and the use of patient decision support, the NHS in England invested approximately £1.5M in 2009-10 creating a platform of web-based patient decision support, as part of an England-wide shared decision making programme. NHS Direct was commissioned by the East of England Strategic Health Authority to adapt, host and pilot the introduction of web-based decision support interventions into the NHS, as part of the Quality Innovation, Performance and Prevention Programme.

A multi-phase programme of work was proposed, with the aim of creating an easily accessed web-based set of patient decision support tools hosted on an NHS web-platform coupled with telephone support (2). An external evaluation was set up to assess whether clinical teams would direct patients to these tools and to assess uptake and use. This article reports the main findings of the evaluation, based on web-server logs and interviews with clinical staff.

## Methods

Two phases were planned. In each phase, three web interventions were adapted and hosted on NHS Direct's website. NHS sites were recruited into evaluation pilots of approximately three-month's duration – see Table 1.

In phase 1, the three interventions were adaptations of programmes originally developed by the Foundation for Informed Decision Making, Boston (see Table 1). The prostate web interventions were originally produced in DVD versions and had been previously introduced into some clinics in England (8)(9).

1  
2  
3 Eight NHS clinics, across England, some with previous involvement in the development of the DVD and  
4 web-based versions, agreed to introduce patients to them. For the knee condition, patients referred to  
5 secondary care were identified by staff at the relevant clinics and directed to access the web-based  
6 tools to read information about a range of treatment options, e.g. physiotherapy, injections and knee  
7 replacement. If patients completed the use of the web tool, a personalised summary was generated  
8 that listed their preferred treatment. Patients were asked to either print this summary or, when they  
9 attended their next clinic appointment, to ask for the summary to be discussed with them. It had  
10 estimated that 360 patients across three clinics would be eligible to use the knee osteoarthritis web  
11 intervention during the evaluation period. Similar methods were applied to the web tools for BHP and  
12 LPC.  
13

14  
15 In phase 2, three interventions were adapted from tools developed at Cardiff University (see Table 1).  
16 Data was collected from 7 breast cancer and 7 antenatal outpatient clinics recruited by NHS Direct  
17 (Table 2). Estimates of patients potentially eligible for these tools had been set at 50 per site, a pool of  
18 around 700 patients. Primary Care Trusts in England were asked to contact primary care practices,  
19 alerting clinicians to the availability of the PSA decision support tool.  
20

## 21 Data Collection

22 Data was collected in each phase for a maximum of 14 weeks using the following methods:  
23

24  
25 *Referral data:* In both phases, clinics kept a record of patients directed to use the tools. Patients were  
26 given unique access codes, enabling anonymised tracking of server web logs.  
27

28  
29 *Web logs:* web server log data was collected, tracking access (content and duration) of each web page  
30 viewed.  
31

32  
33 *Interviews with health professionals:* After informed consent was obtained, semi-structured interviews  
34 were conducted with medical and nursing specialists responsible for implementing the intervention at  
35 each clinic. The respondents were asked their views about the web-based patient decision support and  
36 the role they might play in their work. Interviews were conducted at the start, mid-point and end of the  
37 pilots, audio-recorded and transcribed. Results from the evaluation of the first phase led to a change of  
38 focus for the evaluation of the second phase.  
39

40  
41 *Patient interviews and surveys:* Short survey tools addressed questions about usability and assessed  
42 knowledge about the relevant condition. Patients also consented to a semi-structured telephone  
43 interview about their experience of using the site.  
44

45  
46 *Data analysis:* Web server log data were verified, cleaned and analysed by TH. AR and DJ coded the  
47 interviews independently, meeting to agree coding frames, prior to jointly categorising the data into  
48 themes related to clinician views about the decision support tools and their willingness to direct patients  
49 to them.  
50

## 51 Results

52  
53 *Patient's access and use:* Records indicate that 162 of the estimated potential pool of 360 patients  
54 were offered access to the OA knee tool: 102 of the 162 visited (63%) visited the site, at least briefly. A  
55 total of 38 (23%) provided some information; 27 patients (26%) used the site in sufficiently to produce a  
56 summary sheet that could be used in a future clinic appointment. This number represents 7% of those  
57 estimated to have been eligible. No estimates were available for eligible patients in relation to BPH and  
58  
59  
60

LPC, or for numbers directed to the sites. Web log data showed 24 and 8 unique visitors to the LPC and BPH sites respectively, resulting in 5 and 2 patients using the sites from introductory pages to summary page, answering all questions.

To compensate for the unexpected access rates in phase one, the number of participating clinics planned for phase two was increased. Based on attendance rates, 700 patients had been considered eligible (50 at each of 14 clinics). The actual uptake was less than expected: 157 patients were directed to the amniocentesis web tool and 36 patients were directed to the breast cancer tool (data were only available from four of the seven breast clinics) (Table 2). Data about the number of patients directed to the PSA website from primary care were not available.

Table 2 also describes considerable variation between clinics in the number of patients who accessed the tool. Three of the antenatal clinics had access rates of 60% or higher; all the other antenatal clinics had access rates of 28% or lower. Having gained access, 26/54 (48%) patients viewed the amniocentesis site for 30 minutes or more, indicating significant levels of interest after overcoming the access hurdle. These data suggest that high proportion of patients will potentially access and use decision support tools: how best to motivate professionals to direct patients to these interventions is a challenge.

*Interviews with health professionals:* During phases 1 and 2, 57 interviews were conducted with health care professionals, across all sites, (see Table 3). Interviews in phase 2 focused on examining reasons for the unexpected low number of patients directed to use the decision support tools and what steps might be helpful in embedding patient decision support into routine practice. Analysis of the interviews revealed overall resistance to directing patients to use decision support. This resistance arose from existing professional attitudes and to barriers arising from current organisational routines. Box 1 illustrates the main themes found in the data:

#### Box 1 Summary of thematic analysis

| Theme                                                                           | Summary                                                                                                                                                                                                                       |
|---------------------------------------------------------------------------------|-------------------------------------------------------------------------------------------------------------------------------------------------------------------------------------------------------------------------------|
| <b>1. Limited motivation to use patient decision support</b>                    | Low motivation for the intended role of patient decision was encountered, as illustrated by uncertain deployment of the tools in clinical pathways and low uptake                                                             |
| <b>2. 'We already do shared decision making'</b>                                | Strong perception that clinicians were already involving patients in decisions, therefore no perceived need to change or to adopt decision support by adapting pathways                                                       |
| <b>3. Perceived patients' barriers to involvement in decision making</b>        | Clinicians cited barriers such as technical access problems and often saw patients as those that did not want to be involved in shared decision making or as those they felt had already accessed information on the internet |
| <b>4. Organisational resistance to patient's involvement in decision making</b> | External efficiency targets and health professionals' views about effective treatments were barriers                                                                                                                          |



## Theme 1 Limited motivation to use patient decision support

The majority of key professionals, specialists, nurses and managers, had been invited to brief introductions about the websites and had been sent an information pack. However, interviews revealed that many clinicians had not fully understood the intended role of the tools, often ascribed to difficulty attending key meetings. Delays in the launch of the tools meant that professionals had not seen the websites, and were therefore uncertain about the content and also where exactly to position them in their clinical pathways.

Ideally, decision support tools should be used by patients when diagnosis and treatment options are confirmed. In urology, this is after urine flow dynamics or biopsies have provided a diagnosis; in knee clinics, this is after osteoarthritis has been confirmed as the likely cause of pain. However, many clinicians saw these tools as means for providing information and not as ways of engaging patients in treatment discussions, provided they did not disrupt clinical workflows. Clinicians reported being happy with: "... anything that makes the patient genuinely more knowledgeable ..." (orthopaedic surgeon, site 3, phase 1) but the concept that patients should use these tools to engage in decisions was not widely understood: "Having a summary sheet is fine for the patient but don't expect me to use it ... it would interfere with what I do, although I can see it might lead to less questions – which is good" (orthopaedic surgeon, site 2, phase 1).

## Theme 2 'We already do shared decision making'

The interviews revealed a widely held belief that decisions were already shared with patients and that this was occurring without the need for patient decision support. As one nurse commented, "I don't know how much more they could be involved [in decisions]" (antenatal screening nurse, clinic 7). An antenatal specialist stated that: "... we moved away from the patriarchal ideal of telling people what to do 20 years ago" (specialist, clinic 7). Many clinicians espoused the view that: "... you wouldn't replace the time you spend with patients by giving them a decision tool ... and the shared decision making process ... isn't dependent on having this kind of tool" (breast care nurse, clinic 4).

## Theme 3 Perceived patient barriers to involvement in decision making

Patients' inability to access the Internet was often raised. "You wonder if they've got access, especially to broadband ..." (specialist nurse, site 4, phase 1) and that: "This generation are not used to getting information in this way" (specialist nurse, site 6, phase 1). Clinicians also gave examples of patients resisting involvement in decisions. A surgeon reported one woman saying, "I'll do whatever you say. You tell me to have a mastectomy, I'll have a mastectomy ..." (breast surgeon, clinic 4). A breast care nurse commented, "... most women... say 'you make the decision for me ... it's much easier if you tell me what I have to have done'" (breast care nurse, clinic 4). Patients were often categorised as either "sufficiently informed" or misinformed, "clutching internet printouts" (breast surgeon, clinic 3). The prevailing view among interviewees was to accept, that, "there is a role for your website but that cohort is very narrow ..." (breast surgeon, clinic 1).

## Theme 4 Organisational resistance to patient's involvement in decision making

External targets were often cited as barriers. Meeting efficiency targets, particularly in cancer, led to constant pressures. As a specialist explained, the constant pressure to "get to a decision" quickly means that clinicians do not "... want to encourage indecisive patients go off [to read a web tool], and then ... come back and see us for another consultation" (breast surgeon, clinic 1).



1  
2  
3 Many clinicians were explicit that they would not direct patients to tools that do not support their own  
4 views about effective treatments. For example, the breast cancer tool lists mastectomy and breast  
5 conservation surgery as treatments that should both be given consideration by women who have early  
6 breast cancer. Yet, many clinics have a different ethos. As one surgeon stated: “*We obviously try to do*  
7 *breast conservation whenever we can. That’s the basic premise...*” (breast surgeon, clinic 1). This  
8 attitude is supported by external audits, where high mastectomy rates are viewed as inappropriate.  
9

10  
11 Routines were perceived as already being under pressure and so asking “... *a midwife to give*  
12 *[information about a web tool] was yet another thing ...*” (antenatal screening coordinator, clinic 1).  
13 Existing processes were viewed as being satisfactory: “*I would say that what we’re doing is actually*  
14 *fine*” (screening midwife, clinic 4) and that the website’s “*information does not make women’s decision*  
15 *about amniocentesis any easier*” (specialist, clinic 7). In short, it was felt that sufficient information was  
16 already available: most clinics did not see the websites as adding value to their work, and therefore saw  
17 no need for change. Nevertheless, three antenatal clinics achieved relatively high uptake rates, more  
18 importantly perhaps, access rates of 60% or higher (clinics 1, 6 and 7 – see Table 2). Interviews  
19 revealed that these three clinics had specifically modified their pathways and were alerting women by  
20 telephone about the tool at the same time as giving them their ‘high risk’ result and offer of  
21 amniocentesis. Women at clinic 7 were encouraged to access the website before attending their  
22 amniocentesis counselling session. Where the tools are integrated into routines, and expectations set  
23 that patients will use them before making decisions, different patterns of use emerge.  
24  
25

#### 26 *Patient interviews and survey*

27 Ten patients in phase 1 volunteered for telephone interview (Table 3). These patients were positive  
28 about the balanced information about treatment options and were satisfied with the clarity of the  
29 website. Technical problems were confirmed. Patients also reported unmet expectations – that having  
30 become informed, it was disappointing to meet clinicians who were unwilling to involve them in decision  
31 making. In phase 1, 45 patients responded to the survey: 84% were very positive about the usefulness  
32 of the site, and 85% very positive about the ease of use, 76% were more positive about their upcoming  
33 outpatient appointment and 69% said that viewing had made a difference to their decision about  
34 treatment. In open comments, patients emphasised the advantage of being recommended high quality  
35 information that was available when it suited them, as one respondent said: “...*in my own time, in my*  
36 *own space and at my own pace*”. No volunteers for interviews or responses to surveys were received in  
37 phase 2.  
38  
39

#### 40 **Discussion**

41  
42  
43 *Principal Findings:* This evaluation demonstrates that the implementation of patient decision support  
44 into routine practice is unlikely to be accomplished by the development of web-based tools alone: the  
45 relatively low uptake of the tools was explained by clinicians’ uncertainty about the content and also  
46 where exactly to position them in their clinical pathways, their perception that ‘shared decision making’  
47 was already commonplace in their teams. A minority also felt that patients, on the whole, are resistant  
48 to engaging in decisions. In addition, there was evidence that external factors, such as efficiency  
49 targets and ‘best practice’ recommendations, are viewed as have more influence in driving decisions  
50 than the informed preferences of patients.  
51  
52

53 In short, clinicians did not feel the need to direct patients to use decision support tools, web-based or  
54 not, and, as a result, felt no requirement to change existing routines. Taken together, these views  
55 represent significant barriers and explain why, in most of the clinics, few patients were directed to use  
56 the tools.  
57  
58  
59  
60

1  
2  
3 It was encouraging however to notice that the data revealed that many patients, when directed to these  
4 tools, are willing to use them and find them helpful. Uptake is highest when clinicians set expectations  
5 that these tools are integral to practice and embed their use into clinical pathways.  
6

7 *Strengths and weakness of methods:* The strengths of the study are the pragmatic use of routine NHS  
8 settings, the purposive sampling of those who had been tasked to introduce patients to these web-  
9 based decision support tools and the use of web server logs to track access – so that actual use of the  
10 tools could be tracked. Constraints were placed on the evaluation processes by the tight service  
11 delivery timetables imposed by the NHS sponsor.  
12

13  
14 Although relevant clinicians were interviewed in all sites, the sample could have been expanded if more  
15 time had been available. A weakness of the study is the lack of patient interviews in the second  
16 evaluation phase, attributable to low uptake of the tools. Although the study sheds some light on some  
17 the implementation barriers, further work is needed into understand how to identify patients that would  
18 benefit from being asked to use decision support, i.e. to determine the eligible numbers in any given  
19 clinical pathway as a way of establishing the denominator population for assessing uptake.  
20

21 *Results in context of other similar work:* Previous work on web-based patient decision support  
22 interventions has been typically undertaken in the context of randomised trials (1) and so it is difficult to  
23 draw comparisons to this pragmatic implementation study. Nevertheless, existing research studies do  
24 illustrate high degrees of difficulty in recruiting patients to use web-based interventions, even with  
25 dedicated resources and incentives (10)(11)(12). Holmes Rovner documented a decade ago that  
26 engaging clinicians to direct patients to use decision support tools active participants was a significant  
27 barrier to implementation (13). Caldon also documented of the concerns and anxieties of health  
28 professionals about patient decision support, such as the threat to clinical autonomy, the fear of more  
29 demanding patients and suspicion that the content was did not accord with their personal practice (4).  
30 These findings are echoed by recent reviews (14)(6)(15).  
31  
32

33  
34 *Implications:* As recently noted by Coulter (7), addressing the implementation challenge will require  
35 efforts targeted at changing hearts, minds and systems. More preparation and training might be helpful  
36 but future work will also need to work on achieving organisation-wide agreement about the role of these  
37 interventions and their location in clinical pathways.  
38  
39

40 **Funding and Ethical Approval:** NHS Direct were commissioned by the East of England Strategic Health Authority to adapt,  
41 host and evaluate the use of patient decision support in England. NHS Direct provided funding for the evaluation,  
42 considered the evaluation under their research governance process and given the service evaluation nature of the study,  
43 decided that ethical approval was not required. NHS Direct had no involvement in the drafting of this article.  
44

45 **Acknowledgements:** We acknowledge the support and advice of the following people. Marie Anne Durand, at the time  
46 Programme Manager of the UK SDM Programme, Steven Laitner, SDM Programme Lead, Nick Chapman, Chief Executive  
47 Officer NHS Direct and Shirley Large, Head of Research NHS Direct.  
48

49 **Contributorship:** GE and AR designed the evaluation; AR and DJ undertook the interviews and conducted the qualitative  
50 analysis. TH undertook the quantitative analysis of the web log data. GE drafted the manuscript and is the guarantor and all  
51 authors contributed to the writing and editing process.  
52

53 **Data sharing:** There is no additional data available.  
54  
55  
56  
57  
58  
59  
60

## References

1. Stacey D, Bennett C, Barry M, Col N, Eden K, Holmes-Rovner M, et al. Decision aids for people facing health treatment or screening decisions. *Cochrane Database of Systematic Reviews*. 2011;(10):CD001431.
2. Elwyn G, Coulter A, Laitner S, Walker E, Watson P, Thomson R. Implementing shared decision making in the NHS. *BMJ*. 2010 Jan;341:c5146.
3. Légaré F, Ratté S, Gravel K, Graham ID. Barriers and facilitators to implementing shared decision-making in clinical practice: update of a systematic review of health professionals' perceptions. *Patient Education and Counseling*. 2008 Dec;73(3):526–35.
4. Caldon LJM, Collins KA, Reed MW, Sivell S, Austoker J, Clements AM, et al. Clinicians' concerns about decision support interventions for patients facing breast cancer surgery options: understanding the challenge of implementing shared decision-making. *Health Expectations*. 2010;14(2):133–46.
5. Feibelman S, Yang TS, Uzogara EE, Sepucha K. What does it take to have sustained use of decision aids? A programme evaluation for the Breast Cancer Initiative. *Health Expectations*. 2011 Mar;14 Suppl 1:85–95.
6. Légaré F, Ratté S, Stacey D, Kryworuchko J, Gravel K, Graham ID, et al. Interventions for improving the adoption of shared decision making by healthcare professionals. *Cochrane Database of Systematic Reviews*. 2010 Jan;(5):CD006732.
7. Coulter A. *Engaging Patients in Healthcare*. New York: Open University Press; 2011.
8. Wirrmann E, Askham J. *Implementing patient decision aids in urology*. Oxford: 2006.
9. Garden J. Implementing an informed decision making programme for urology patients. *Journal of Communication in Healthcare*. 2008;1(3):297–310.
10. Frosch DL, Bhatnagar V, Tally S, Hamori CJ, Kaplan RM, Frosch DL, et al. Internet patient decision support: a randomized controlled trial comparing alternative approaches for men considering prostate cancer screening. *Archives of Internal Medicine* [Internet]. 2008 Feb;168(4):363–9. Available from: <http://search.ebscohost.com/login.aspx?direct=true&db=rzh&AN=2009869904&site=ehost-live;Publisher URL: www.cinahl.com/cgi-bin/refsvc?jid=690&accno=2009869904>
11. Hirsch O, Keller H, Krones T, Donner-Banzhoff N. Acceptance of shared decision making with reference to an electronic library of decision aids (arriba-lib) and its association to decision making in patients. An evaluation study. *Implementation Science* [Internet]. 2011 Jul 7 [cited 2011 Jul 25];6(1):70. Available from: <http://www.ncbi.nlm.nih.gov/pubmed/21736724>
12. Evans R, Elwyn G, Edward A, Newcombe R, Kinnarsley P, Wright P, et al. A randomised controlled trial of the effects of a web-based PSA decision aid, Prosdex. Protocol. *BMC Family Practice*. 2007;8:58.

- 1  
2  
3 13. Holmes-Rovner MV, Valade D, Orłowski C, Draus C, Nabozny-Valerio B, Keiser S.  
4 Implementing shared decision-making in routine practice: Barriers and opportunities.  
5 Health Expectations. 2000;3(3):182–91.  
6
- 7 14. Gravel K, Légaré F, Graham I. Barriers and facilitators to implementing shared  
8 decision-making in clinical practice: a systematic review of health professionals'  
9 perceptions. Implementation Science. 2006;1:16.  
10
- 11 15. Elwyn G, Scholl I, Tietbohl C, Mann M, Edwards AG, Clay K, et al. The  
12 implementation of patient decision support interventions into routine clinical practice:  
13 a systematic review. Implementation Science. 2012;In review.  
14
- 15 16. Durand M-A, Wegwarth O, Boivin J, Elwyn G. Design and usability of heuristic-based  
16 deliberation tools for women facing amniocentesis. Health Expectations [Internet].  
17 2011 Jan [cited 2011 Jan 30];14(doi: 10.1111/j.1369-7625.2010.00651.x):no-no.  
18 Available from: <http://www.ncbi.nlm.nih.gov/pubmed/21241434>  
19
- 20 17. Sivell S, Marsh W, Edwards A, Manstead ASR, Clements A, Elwyn G. Theory-based  
21 design and field-testing of an intervention to support women choosing surgery for  
22 breast cancer: BresDex. Patient Education and Counseling [Internet]. 2011 May 13  
23 [cited 2011 May 18];In Press. Available from:  
24 <http://www.ncbi.nlm.nih.gov/pubmed/21571485>  
25  
26  
27  
28  
29  
30  
31  
32  
33  
34  
35  
36  
37  
38  
39  
40  
41  
42  
43  
44  
45  
46  
47  
48  
49  
50  
51  
52  
53  
54  
55  
56  
57  
58  
59  
60

Table 1 Web-based patient decision support on NHS Direct

| Phase 1                                                          | Reasonable options considered                                                         | Evaluation Period     |
|------------------------------------------------------------------|---------------------------------------------------------------------------------------|-----------------------|
| Osteoarthritis (OA) of the knee (Sites 1, 2 and 3)               | Pain management, lifestyle change, manual therapy, joint injections, knee replacement | June – August 2010    |
| Benign Prostatic Hyperplasia (BPH) (sites 4,5,6,7,8)             | Active monitoring, surgical approaches, medication                                    |                       |
| Localised Prostate Cancer (LPC) (sites 4,5,6,7,8)                | Active monitoring, surgical approaches, medication                                    |                       |
| <b>Phase 2</b>                                                   |                                                                                       |                       |
| Amniocentesis (based on AmnioDex) (16)                           | No test, amniocentesis, chorionic villus sampling                                     | February – April 2011 |
| Breast Cancer (based on BresDex) (17)                            | Breast conservation surgery (lumpectomy) or mastectomy                                |                       |
| Test for prostate specific antigen (PSA) (based on ProsDex) (12) | No test, PSA test                                                                     |                       |

**Table 2** Patients use of the web-tools during phases 1 and 2

|                                                         | Number of patients directed | Number of patients accessing | Number using web tool for > 30 minutes |
|---------------------------------------------------------|-----------------------------|------------------------------|----------------------------------------|
| <b>Clinics in Phase 1 §</b>                             |                             |                              |                                        |
| Osteoarthritis (OA) of the knee, (Sites 1, 2 and 3)     | 162                         | 102 (63%)                    | 26 (16%)                               |
| Urology: Benign Prostatic Hyperplasia (sites 4,5,6,7,8) | Not known                   | 8                            | 2                                      |
| Urology: Localised Prostate Cancer (sites 4,5,6,7,8)    | Not known                   | 24                           | 5                                      |
| <b>Clinics in Phase 2</b>                               |                             |                              |                                        |
| 1 Amniocentesis                                         | 32                          | 20 (63%)                     | 11 (55%)                               |
| 2 Amniocentesis                                         | 25                          | 3 (12%)                      | 1 (33%)                                |
| 3 Amniocentesis                                         | 25                          | 3 (12%)                      | 1 (33%)                                |
| 4 Amniocentesis                                         | 32                          | 9 (28%)                      | 4 (44%)                                |
| 5 Amniocentesis                                         | 20                          | 3 (15%)                      | 1 (33%)                                |
| 6 Amniocentesis                                         | 10                          | 6 (60%)                      | 3 (50%)                                |
| 7 Amniocentesis                                         | 13                          | 10 (77%)                     | 5 (50%)                                |
| <b>All antenatal clinics</b>                            | <b>157</b>                  | <b>54/157 (34%)</b>          | <b>26/54 (48%)</b>                     |
| 1 Breast cancer                                         | 12                          | 1 (8%)                       | 1 (100%)                               |
| 2 Breast cancer                                         | 20                          | 0 (0%)                       | Not applicable                         |
| 3 Breast cancer                                         | 2                           | 0 (0%)                       | Not applicable                         |
| 4 Breast cancer                                         | 2                           | 0 (0%)                       | Not applicable                         |
| 5 Breast cancer                                         | Unknown                     | 2                            | 2 (100%)                               |
| 6 Breast cancer                                         | Unknown                     | 0                            | Not applicable                         |
| 7 Breast cancer                                         | Unknown                     | 1                            | 0 (0%)                                 |
| <b>All breast cancer clinics</b>                        | <b>36</b>                   | <b>4/36 (11%)</b>            | <b>3/4 (75%)</b>                       |

§ In phase 1, numbers are aggregated.

**Table 3** Interviews undertaken for each intervention

| Intervention                 | Number healthcare professionals interviewed | Number of patients interviewed |
|------------------------------|---------------------------------------------|--------------------------------|
| Osteoarthritis of the knee   | 6                                           | 6                              |
| Benign Prostatic Hyperplasia | 4                                           | 1                              |
| Localised Prostate Cancer    | 5                                           | 3                              |
| Amniocentesis                | 19                                          | 0                              |
| Breast Cancer                | 23                                          | 0                              |
| Prostate Specific Antigen    | 0                                           | 0                              |
| <b>Total</b>                 | <b>57</b>                                   | <b>10</b>                      |

Table 1 Web-based patient decision support on NHS Direct

| Phase 1                                                          | Reasonable options considered                                                         | Evaluation Period     |
|------------------------------------------------------------------|---------------------------------------------------------------------------------------|-----------------------|
| Osteoarthritis (OA) of the knee (Sites 1, 2 and 3)               | Pain management, lifestyle change, manual therapy, joint injections, knee replacement | June – August 2010    |
| Benign Prostatic Hyperplasia (BPH) (sites 4,5,6,7,8)             | Active monitoring, surgical approaches, medication                                    |                       |
| Localised Prostate Cancer (LPC) (sites 4,5,6,7,8)                | Active monitoring, surgical approaches, medication                                    |                       |
| <b>Phase 2</b>                                                   |                                                                                       |                       |
| Amniocentesis (based on AmnioDex) (16)                           | No test, amniocentesis, chorionic villus sampling                                     | February – April 2011 |
| Breast Cancer (based on BresDex) (17)                            | Breast conservation surgery (lumpectomy) or mastectomy                                |                       |
| Test for prostate specific antigen (PSA) (based on ProsDex) (12) | No test, PSA test                                                                     |                       |



**Table 2** Patients use of the web-tools during phases 1 and 2

|                                                         | Number of patients directed | Number of patients accessing | Number using web tool for > 30 minutes |
|---------------------------------------------------------|-----------------------------|------------------------------|----------------------------------------|
| <b>Clinics in Phase 1 §</b>                             |                             |                              |                                        |
| Osteoarthritis (OA) of the knee, (Sites 1, 2 and 3)     | 162                         | 102 (63%)                    | 26 (16%)                               |
| Urology: Benign Prostatic Hyperplasia (sites 4,5,6,7,8) | Not known                   | 8                            | 2                                      |
| Urology: Localised Prostate Cancer (sites 4,5,6,7,8)    | Not known                   | 24                           | 5                                      |
| <b>Clinics in Phase 2</b>                               |                             |                              |                                        |
| 1 Amniocentesis                                         | 32                          | 20 (63%)                     | 11 (55%)                               |
| 2 Amniocentesis                                         | 25                          | 3 (12%)                      | 1 (33%)                                |
| 3 Amniocentesis                                         | 25                          | 3 (12%)                      | 1 (33%)                                |
| 4 Amniocentesis                                         | 32                          | 9 (28%)                      | 4 (44%)                                |
| 5 Amniocentesis                                         | 20                          | 3 (15%)                      | 1 (33%)                                |
| 6 Amniocentesis                                         | 10                          | 6 (60%)                      | 3 (50%)                                |
| 7 Amniocentesis                                         | 13                          | 10 (77%)                     | 5 (50%)                                |
| <b>All antenatal clinics</b>                            | <b>157</b>                  | <b>54/157 (34%)</b>          | <b>26/54 (48%)</b>                     |
| 1 Breast cancer                                         | 12                          | 1 (8%)                       | 1 (100%)                               |
| 2 Breast cancer                                         | 20                          | 0 (0%)                       | Not applicable                         |
| 3 Breast cancer                                         | 2                           | 0 (0%)                       | Not applicable                         |
| 4 Breast cancer                                         | 2                           | 0 (0%)                       | Not applicable                         |
| 5 Breast cancer                                         | Unknown                     | 2                            | 2 (100%)                               |
| 6 Breast cancer                                         | Unknown                     | 0                            | Not applicable                         |
| 7 Breast cancer                                         | Unknown                     | 1                            | 0 (0%)                                 |
| <b>All breast cancer clinics</b>                        | <b>36</b>                   | <b>4/36 (11%)</b>            | <b>3/4 (75%)</b>                       |

§ In phase 1, numbers are aggregated.

**Table 3** Interviews undertaken for each intervention

|                              | Number healthcare professionals interviewed | Number of patients interviewed |
|------------------------------|---------------------------------------------|--------------------------------|
| <b>Intervention</b>          |                                             |                                |
| Osteoarthritis of the knee   | 6                                           | 6                              |
| Benign Prostatic Hyperplasia | 4                                           | 1                              |
| Localised Prostate Cancer    | 5                                           | 3                              |
| Amniocentesis                | 19                                          | 0                              |
| Breast Cancer                | 23                                          | 0                              |
| Prostate Specific Antigen    | 0                                           | 0                              |
| <b>Total</b>                 | <b>57</b>                                   | <b>10</b>                      |



**Why clinicians don't refer patients to online decision support tools: interviews from front line clinics in the NHS.**

|                                 |                                                                                                                                                                                                                                                                                                                                                                   |
|---------------------------------|-------------------------------------------------------------------------------------------------------------------------------------------------------------------------------------------------------------------------------------------------------------------------------------------------------------------------------------------------------------------|
| Journal:                        | <i>BMJ Open</i>                                                                                                                                                                                                                                                                                                                                                   |
| Manuscript ID:                  | bmjopen-2012-001530.R1                                                                                                                                                                                                                                                                                                                                            |
| Article Type:                   | Research                                                                                                                                                                                                                                                                                                                                                          |
| Date Submitted by the Author:   | 19-Sep-2012                                                                                                                                                                                                                                                                                                                                                       |
| Complete List of Authors:       | Elwyn, Glyn; Cardiff University, Cochrane Institute of Primary Care and Public Health<br>Rix, Andrew; Cardiff University, Cochrane Institute of Primary Care and Public Health<br>Holt, Tom; Cardiff University, Cochrane Institute of Primary Care and Public Health<br>Jones, Deborah; Cardiff University, Cochrane Institute of Primary Care and Public Health |
| <b>Primary Subject Heading</b>: | Evidence based practice                                                                                                                                                                                                                                                                                                                                           |
| Secondary Subject Heading:      | Communication, Evidence based practice, Health services research, Patient-centred medicine                                                                                                                                                                                                                                                                        |
| Keywords:                       | QUALITATIVE RESEARCH, Quality in health care < HEALTH SERVICES ADMINISTRATION & MANAGEMENT, Health service research, shared decision making, decision support interventions, patient decision aids                                                                                                                                                                |
|                                 |                                                                                                                                                                                                                                                                                                                                                                   |

SCHOLARONE™  
Manuscripts

only

1  
2  
3 **Why clinicians don't refer patents to online decision support tools? Interviews from front line**  
4 **clinics in the NHS.**  
5

6 Glyn Elwyn, Andrew Rix, Tom Holt, Deborah Jones  
7  
8  
9

10  
11 **Cochrane Institute of Primary Care and Public Health**  
12 **Neuadd Meirionydd**  
13 **School of Medicine**  
14 **Cardiff University**  
15 **Heath Park**  
16 **United Kingdom**  
17 **CF14 4YS**  
18  
19

20 Glyn Elwyn, professor, [elwyng@cardiff.ac.uk](mailto:elwyng@cardiff.ac.uk)

21 Andrew Rix, independent researcher, [andrewrixhome@gmail.com](mailto:andrewrixhome@gmail.com)

22 Tom Holt, independent researcher, [tbholt1@gmail.com](mailto:tbholt1@gmail.com)

23 Deborah Jones, independent researcher, [deb.jns64@gmail.com](mailto:deb.jns64@gmail.com)  
24  
25  
26

27 **Address for correspondence:** Glyn Elwyn - [glynelwyn@gmail.com](mailto:glynelwyn@gmail.com)  
28  
29

30 **Keywords:** patient decision support, decision aids, shared decision making, patient centred care,  
31 informed consent.  
32

33 The Corresponding Author has the right to grant on behalf of all authors and does grant on behalf of all  
34 authors, an exclusive licence (or non exclusive for government employees) on a worldwide basis to the  
35 BMJ Publishing Group Ltd to permit this article (if accepted) to be published in BMJ editions and any  
36 other BMJ PGL products and sublicences such use and exploit all subsidiary rights, as set out in our  
37 licence.

38 All authors have completed the Unified Competing Interest form

39 [http://www.icmje.org/coi\\_disclosure.pdf](http://www.icmje.org/coi_disclosure.pdf) (available on request from the corresponding author) and  
40 declare: no support from any organisation for the submitted work [or describe if any]; no financial  
41 relationships with any organisations that might have an interest in the submitted work in the previous  
42 three years [or describe if any], no other relationships or activities that could appear to have influenced  
43 the submitted work [or describe if any].  
44  
45  
46  
47  
48  
49  
50  
51  
52  
53  
54  
55  
56  
57  
58  
59  
60

## Summary

### Focus

- Research studies demonstrate that engaging patients in the use of decision support (decision aids) is beneficial but there are significant challenges to their implementation into practice
- Clinicians are in a position to advocate the use of patient decision support but do not appear to do so.

### Key messages

- Reluctance to refer patients to decision support is largely based on the scepticism of professionals that these tools add value, coupled with difficulties of incorporating the tools into existing workflows and competing organisational pressures, such as targets
- This reluctance will not be overcome simply by placing tools on the web
- When appropriately directed, a significant number of patients do use the decision support and say they find them useful.

### Strengths and Limitations

- The evaluation study upon which these results are based set out to explore patterns of usage but turned to examine why take up was lower than expected
- The evidence comes mainly from 57 qualitative interviews with healthcare professionals taking part in the introduction of six web-based decision support tools hosted on the NHS Direct website

**Abstract**

**Objective:** To assess whether clinical teams would direct patients to use web-based patient decision support interventions (DESI) and whether patients would use them.

**Design:** Retrospective semi-structured interviews and web server log analysis.

**Participants and settings:** 57 NHS professionals (nurses, doctors and others) in orthopaedic, antenatal, breast, urology clinics and in primary care practices across 22 NHS sites given access to DESIs hosted on the NHS Direct web-site.

**Results:** Fewer than expected patients were directed to use the web tools. The most significant obstacles to referral to the tools were the attitudes of clinicians and clinical teams. Technical problems contributed to the problems but the low uptake was mainly explained by clinicians' limited understanding of how patient DESIs could be helpful in clinical pathways, their perception that 'shared decision making' was already commonplace and that, in their view, some patients are resistant to being involved in treatment decisions. External factors, such as efficiency targets and 'best practice' recommendations were also cited being significant barriers. Clinicians did not feel the need to refer patients to use decision support tools, web-based or not, and, as a result, felt no requirement to change existing practice routines. Uptake is highest when clinicians set expectations that these tools are integral to practice and embed their use into clinical pathways.

**Conclusions:** Existing evidence of patient benefit and the free availability of patient DESIs via the web are not sufficient drivers to achieve routine use. Health professionals were not motivated to refer patients to these interventions. Clinicians will not use these interventions simply because they are made available, despite good evidence of benefit to patients. These attitudes are deep seated and will not be modified by solely developing web-based interventions: a broader strategy will be required to embed DESIs into routine practice.

**Words:** 284

**Article words:** 3153

## Introduction

Are clinical teams willing to ask patients to use decision support interventions, when hosted on the web? A decade of research has demonstrated consistent positive outcomes when patient decision support interventions, often called decision aids, are evaluated in randomised controlled trials (1). Use of these interventions is advocated in order to help achieve shared decision making – where patients and clinicians work together to arrive at decisions that best match the informed patient preference (2). These interventions typically consider clinical situations where there are reasonable alternatives. Typical examples are whether to proceed to a total knee replacement or use alternative treatments or whether to accept or decline an amniocentesis, a procedure that runs the risk of leading to a miscarriage. When these interventions are used, patient knowledge increases, risk perceptions are more accurate, patients feel more actively involved in decisions and often tend to make more conservative choices, especially when considering discretionary surgery (1).

Despite good evidence and increasing policy support, studies have revealed resistance to the implementation of shared decision making and decision support (3). Professionals often hold the view that they 'already do' shared decision making, that the interventions promoted lack applicability to individual patients and that there is insufficient time to involve patients in decisions (4). To date, only a few studies have addressed the use of implementing these interventions in routine clinical settings (5). Many obstacles have been described and it is too early to say whether the benefits observed in randomised trials can be replicated (6). As yet, there has been no large scale study to assess the uptake possible in pragmatic settings (7).

Responding to the potential benefits of shared decision making and the use of patient decision support, the NHS in England invested approximately £1.5M in 2009-10 creating a platform of web-based patient decision support, as part of an England-wide shared decision making programme. NHS Direct was commissioned by the East of England Strategic Health Authority to adapt, host and pilot the introduction of web-based decision support interventions into the NHS, as part of the Quality Innovation, Performance and Prevention Programme.

A multi-phase programme of work was proposed, with the aim of creating an easily accessed web-based set of patient decision support tools hosted on an NHS web-platform coupled with telephone support (2). An external evaluation was set up to assess whether clinical teams would direct patients to these tools and to assess uptake and use. This article reports on the attitudes of participating staff which lie behind the reluctance to refer patients to these tools.

## Methods

Two phases were planned. In each phase, three web interventions were adapted and hosted on NHS Direct's website. NHS sites were recruited into evaluation pilots of approximately three-month's duration – see Table 1.

In phase 1, the three interventions were adaptations of programmes originally developed by the Foundation for Informed Decision Making, Boston (see Table 1). The prostate web interventions were



originally produced in DVD versions and had been previously introduced into some clinics in England (8)(9).

Eight NHS clinics, across England, some with previous involvement in the development of the DVD and web-based versions, agreed to introduce patients to them. For the knee condition, patients referred to secondary care were identified by staff and directed to access the web-based tools to read information about a range of treatment options, e.g. physiotherapy, injections and knee replacement. If patients completed the use of the web tool, a personalised summary was generated that listed their preferred treatment. Patients were asked to either print this summary or, when they attended their next clinic appointment, to ask for the summary to be discussed with them. It had been estimated that 360 patients across three clinics would be eligible to use the knee osteoarthritis web intervention during the evaluation period. Similar methods were applied to the web tools for BHP and LPC.

In phase 2, three interventions were adapted from tools developed at Cardiff University (Table 1). Data was collected from 7 breast cancer and 7 antenatal outpatient clinics recruited by NHS Direct (Table 2). Estimates of patients potentially eligible for these tools had been set at 50 per site, a pool of around 700 patients. Primary Care Trusts in England were asked to contact primary care practices, alerting clinicians to the availability of the PSA decision support tool.

### Data Collection

Data was collected in each phase for a maximum of 14 weeks using the following methods:

*Referral data:* In both phases, clinics kept a record of patients directed to use the tools. Patients were given unique access codes, enabling anonymised tracking of server web logs.

*Web logs:* web server log data was collected, tracking access (content and duration) of each web page viewed.

*Interviews with health professionals:* After informed consent was obtained, semi-structured interviews were conducted with medical and nursing specialists responsible for implementing the intervention at each clinic. The respondents were asked their views about the web-based patient decision support and whether they had referred patients to them, we asked about the role they might play in their work. Interviews were conducted at the start, mid-point and end of the pilots, audio-recorded and transcribed. Results from the evaluation of the first phase led to a change of focus for the evaluation of the second phase.

*Data analysis:* Web server log data were verified, cleaned and analysed by TH. AR and DJ coded the interviews independently, meeting to agree coding frames, prior to jointly categorising the data into themes related to clinician views about the decision support tools and their willingness to direct patients to them.

### Results

*Patient's access and use:* Records indicate that 162 of the estimated potential pool of 360 patients were offered access to the OA knee tool: 102 of the 162 visited (63%) visited the site, at least briefly. A total of 38 (23%) provided some information; 27 patients (26%) used the site in sufficiently to produce a summary sheet that could be used in a future clinic appointment. This number represents 7% of those estimated to have been eligible. No estimates were available for eligible patients in relation to BPH and LPC, or for numbers directed to the sites. Web log data showed 24 and 8 unique visitors to the LPC

and BPH sites respectively, resulting in 5 and 2 patients using the sites from introductory pages to summary page, answering all questions.

To compensate for the unexpected access rates in phase one, the number of participating clinics planned for phase two was increased. Based on attendance rates, 700 patients had been considered eligible (50 at each of 14 clinics). The actual uptake was less than expected: 157 patients were directed to the amniocentesis web tool and 36 patients were directed to the breast cancer tool (data were only available from four of the seven breast clinics) (Table 2). Data about the number of patients directed to the PSA website from primary care were not available.

Table 2 also describes considerable variation between clinics in the number of patients who accessed the tool. Three of the antenatal clinics had access rates of 60% or higher; all the other antenatal clinics had access rates of 28% or lower. Having gained access, 26/54 (48%) patients viewed the amniocentesis site for 30 minutes or more, indicating significant levels of interest after overcoming the access hurdle. These data suggest that high proportion of patients will potentially access and use decision support tools: how best to motivate professionals to direct patients to these interventions is a challenge.

*Interviews with health professionals:* During phases 1 and 2, 57 interviews were conducted with health care professionals, across all sites, (see Table 3). Interviews in phase 2 focused on examining reasons for the unexpected low number of patients directed to use the decision support tools and what steps might be helpful in embedding patient decision support into routine practice. Analysis of the interviews revealed overall resistance to directing patients to use decision support. This resistance arose from existing professional attitudes and to barriers arising from current organisational routines. Box 1 illustrates the main themes found in the data:

#### Box 1 Summary of themes derived from the qualitative analysis

| Theme                                                                           | Summary                                                                                                                                                                                                                       |
|---------------------------------------------------------------------------------|-------------------------------------------------------------------------------------------------------------------------------------------------------------------------------------------------------------------------------|
| <b>1. Limited motivation to use patient decision support</b>                    | Low motivation for the intended role of patient decision was encountered, as illustrated by uncertain deployment of the tools in clinical pathways and low uptake by patients                                                 |
| <b>2. 'We already do shared decision making'</b>                                | Strong perception that clinicians were already involving patients in decisions, therefore no perceived need to change or to adopt decision support by adapting pathways                                                       |
| <b>3. Perceived patients' barriers to involvement in decision making</b>        | Clinicians cited barriers such as technical access problems and often saw patients as those that did not want to be involved in shared decision making or as those they felt had already accessed information on the internet |
| <b>4. Organisational resistance to patient's involvement in decision making</b> | External efficiency targets and health professionals' views about effective treatments were barriers                                                                                                                          |

## Theme 1 Limited motivation to use patient decision support

The majority of key professionals, specialists, nurses and managers, had been invited to brief introductions about the websites and had been sent an information pack. However, interviews revealed that many clinicians had not fully understood the intended role of the tools. Ideally, decision support tools should be used by patients when diagnosis and treatment options are confirmed. In urology, this is after urine flow dynamics or biopsies have provided a diagnosis; in knee clinics, this is after osteoarthritis has been confirmed as the likely cause of pain. However, many clinicians saw these tools as merely means for providing information and not as ways of engaging patients in discussions about treatment decisions. Clinicians reported being happy with: "... anything that makes the patient genuinely more knowledgeable ..." (orthopaedic surgeon, site 3, phase 1). However, the concept that patients should use these tools to engage in decisions was not widely understood: "Having a summary sheet is fine for the patient but don't expect me to use it ... it would interfere with what I do, although I can see it might lead to less questions – which is good" (orthopaedic surgeon, site 2, phase 1).

## Theme 2 'We already do shared decision making'

The interviews revealed a widely held belief that decisions were already shared with patients and that this was occurring without the need for patient decision support. As one nurse commented, "I don't know how much more they could be involved [in decisions]" (antenatal screening nurse, clinic 7). An antenatal specialist stated that: "... we moved away from the patriarchal ideal of telling people what to do 20 years ago" (specialist, clinic 7). Many clinicians espoused the view that: "... you wouldn't replace the time you spend with patients by giving them a decision tool ... and the shared decision making process ... isn't dependent on having this kind of tool" (breast care nurse, clinic 4).

## Theme 3 Perceived patient barriers to involvement in decision making

Patients' inability to access the Internet was often raised. "You wonder if they've got access, especially to broadband ..." (specialist nurse, site 4, phase 1) and that: "This generation are not used to getting information in this way" (specialist nurse, site 6, phase 1). Clinicians also gave examples of patients resisting involvement in decisions. A surgeon reported one woman saying, "I'll do whatever you say. You tell me to have a mastectomy, I'll have a mastectomy ..." (breast surgeon, clinic 4). A breast care nurse commented, "... most women... say 'you make the decision for me ... it's much easier if you tell me what I have to have done'" (breast care nurse, clinic 4). Patients were often categorised as either "sufficiently informed" or misinformed, "clutching internet printouts" (breast surgeon, clinic 3). The prevailing view among interviewees was to accept, that, "there is a role for your website but that cohort is very narrow ..." (breast surgeon, clinic 1).

## Theme 4 Organisational resistance to patient's involvement in decision making

External targets were often cited as barriers. Meeting efficiency targets, particularly in cancer, led to constant pressures. As a specialist explained, the constant pressure to "get to a decision" quickly means that clinicians do not "... want to encourage indecisive patients go off [to read a web tool], and then ... come back and see us for another consultation" (breast surgeon, clinic 1).

Many clinicians were explicit that they would not direct patients to tools that do not support their own views about effective treatments. For example, the breast cancer tool lists mastectomy and breast conservation surgery as treatments that should both be given consideration by women who have early breast cancer. Yet, many clinics have a different ethos. As one surgeon stated: "We obviously try to do

1  
2  
3 *breast conservation whenever we can. That's the basic premise...* (breast surgeon, clinic 1). This  
4 attitude is supported by external audits, where high mastectomy rates are viewed as inappropriate.  
5

6 Routines were perceived as already being under pressure and so asking “... a midwife to give  
7 *[information about a web tool] was yet another thing ...*” (antenatal screening coordinator, clinic 1).  
8 Existing processes were viewed as being satisfactory: “*I would say that what we're doing is actually*  
9 *fine*” (screening midwife, clinic 4) and that the website’s “*information does not make women's decision*  
10 *about amniocentesis any easier*” (specialist, clinic 7). In short, it was felt that sufficient information was  
11 already available: most clinics did not see the websites as adding value to their work, and therefore saw  
12 no need for change. Nevertheless, three antenatal clinics achieved relatively high uptake rates, more  
13 importantly perhaps, access rates of 60% or higher (clinics 1, 6 and 7 – see Table 2). Interviews  
14 revealed that these three clinics had specifically modified their pathways and were alerting women by  
15 telephone about the tool at the same time as giving them their ‘high risk’ result and offer of  
16 amniocentesis. Women at clinic 7 were encouraged to access the website before attending their  
17 amniocentesis counselling session. Where the tools are integrated into routines, and expectations set  
18 that patients will use them before making decisions, different patterns of use emerge.  
19  
20

## 21 Discussion

22  
23  
24 *Principal Findings:* This evaluation demonstrates that the implementation of patient decision support  
25 into routine practice is unlikely to be accomplished by the development of web-based tools alone: the  
26 relatively low uptake of the tools was explained by clinicians’ uncertainty about the content and also  
27 where exactly to position them in their clinical pathways, their perception that ‘shared decision making’  
28 was already commonplace in their teams. A minority also felt that patients, on the whole, are resistant  
29 to engaging in decisions. In addition, there was evidence that external factors, such as efficiency  
30 targets and ‘best practice’ recommendations, are viewed as have more influence in driving decisions  
31 than the informed preferences of patients.  
32  
33

34 In short, clinicians did not feel the need to direct patients to use decision support tools, web-based or  
35 not, and, as a result, felt no requirement to change existing routines. Taken together, these views  
36 represent significant barriers and explain why, in most of the clinics, few patients were directed to use  
37 the tools.  
38

39 It was encouraging however to notice that the data revealed that many patients, when directed to these  
40 tools, are willing to use them. Uptake is highest when clinicians set expectations that these tools are  
41 integral to practice and embed their use into clinical pathways.  
42  
43

44 *Strengths and weakness of methods:* The strengths of the study are the pragmatic use of routine NHS  
45 settings, the purposive sampling of those who had been actually tasked to introduce patients to these  
46 web-based decision support tools. The use of web server logs to track access provides direct data  
47 about the actual use of the tools. Constraints were placed on the intensity of the evaluation processes  
48 by the tight service delivery timetables set by the NHS sponsor.  
49

50 Although relevant clinicians were interviewed in all sites, the sample could have been expanded if more  
51 time had been available. Although the study sheds some light on some the implementation barriers,  
52 further work is needed into understand how to identify patients that would benefit from being asked to  
53 use decision support, i.e. to determine the eligible numbers in any given clinical pathway as a way of  
54 establishing the denominator population for assessing uptake.  
55  
56  
57  
58  
59  
60

1  
2  
3 *Results in context of other similar work:* Previous work on web-based patient decision support  
4 interventions has been typically undertaken in the context of randomised trials (1) and so it is difficult to  
5 draw comparisons to this pragmatic implementation study. Nevertheless, existing research studies do  
6 illustrate high degrees of difficulty in recruiting patients to use web-based interventions, even with  
7 dedicated resources and incentives (10)(11)(12). Holmes Rovner documented a decade ago that  
8 engaging clinicians to direct patients to use decision support tools active participants was a significant  
9 barrier to implementation (13). Caldon also documented of the concerns and anxieties of health  
10 professionals about patient decision support, such as the threat to clinical autonomy, the fear of more  
11 demanding patients and suspicion that the content was did not accord with their personal practice (4).  
12 These findings are echoed by recent reviews (14)(6)(15).  
13  
14

15 *Implications:* As recently noted by Coulter (7), addressing the implementation challenge will require  
16 efforts targeted at changing hearts, minds and systems. More preparation and training might be helpful  
17 but future work will also need to work on achieving organisation-wide agreement about the role of these  
18 interventions and their location in clinical pathways.  
19  
20

21 **Funding and Ethical Approval:** NHS Direct were commissioned by the East of England Strategic Health Authority to adapt,  
22 host and evaluate the use of patient decision support in England. NHS Direct provided funding for the evaluation,  
23 considered the evaluation under their research governance process and given the service evaluation nature of the study,  
24 decided that ethical approval was not required. NHS Direct had no involvement in the drafting of this article.  
25

26 **Acknowledgements:** We acknowledge the support and advice of the following people. Marie Anne Durand, at the time  
27 Programme Manager of the UK SDM Programme, Steven Laitner, SDM Programme Lead, Nick Chapman, Chief Executive  
28 Officer NHS Direct and Shirley Large, Head of Research NHS Direct.  
29

30 **Contributorship:** GE and AR designed the evaluation; AR and DJ undertook the interviews and conducted the qualitative  
31 analysis. TH undertook the quantitative analysis of the web log data. GE drafted the manuscript and is the guarantor and all  
32 authors contributed to the writing and editing process.  
33

34 **Data sharing:** There is no additional data available.  
35  
36  
37  
38  
39  
40  
41  
42  
43  
44  
45  
46  
47  
48  
49  
50  
51  
52  
53  
54  
55  
56  
57  
58  
59  
60



## References

1. Stacey D, Bennett C, Barry M, Col N, Eden K, Holmes-Rovner M, et al. Decision aids for people facing health treatment or screening decisions. *Cochrane Database of Systematic Reviews*. 2011;(10):CD001431.
2. Elwyn G, Coulter A, Laitner S, Walker E, Watson P, Thomson R. Implementing shared decision making in the NHS. *BMJ*. 2010 Jan;341:c5146.
3. Légaré F, Ratté S, Gravel K, Graham ID. Barriers and facilitators to implementing shared decision-making in clinical practice: update of a systematic review of health professionals' perceptions. *Patient Education and Counseling*. 2008 Dec;73(3):526–35.
4. Caldon L, Collins K, Reed M, Sivell S, Austoker J, Clements A, et al. Clinicians' concerns about decision support interventions for patients facing breast cancer surgery options: understanding the challenge of implementing shared decision-making. *Health Expectations*. Blackwell Publishing Ltd; 2010;14(2):133–46.
5. Feibelmann S, Yang TS, Uzogara EE, Sepucha K. What does it take to have sustained use of decision aids? A programme evaluation for the Breast Cancer Initiative. *Health Expectations*. 2011 Mar;14 Suppl 1:85–95.
6. Légaré F, Ratté S, Stacey D, Kryworuchko J, Gravel K, Graham ID, et al. Interventions for improving the adoption of shared decision making by healthcare professionals. *Cochrane Database of Systematic Reviews*. 2010 Jan;(5):CD006732.
7. Coulter A. *Engaging Patients in Healthcare*. New York: Open University Press; 2011.
8. Wirmann E, Askham J. *Implementing patient decision aids in urology*. Oxford; 2006.
9. Garden J. Implementing an informed decision making programme for urology patients. *Journal of Communication in Healthcare*. 2008;1(3):297–310.
10. Frosch DL, Bhatnagar V, Tally S, Hamori CJ, Kaplan RM, Frosch DL, et al. Internet patient decision support: a randomized controlled trial comparing alternative approaches for men considering prostate cancer screening. *Archives of Internal Medicine [Internet]*. 2008 Feb;168(4):363–9. Available from: <http://search.ebscohost.com/login.aspx?direct=true&db=rzh&AN=2009869904&site=ehost-live;Publisher URL: www.cinahl.com/cgi-bin/refsvc?jid=690&accno=2009869904>
11. Hirsch O, Keller H, Krones T, Donner-Banzhoff N. Acceptance of shared decision making with reference to an electronic library of decision aids (arriba-lib) and its association to decision making in patients. An evaluation study. *Implementation Science [Internet]*. 2011 Jul 7 [cited 2011 Jul 25];6(1):70. Available from: <http://www.ncbi.nlm.nih.gov/pubmed/21736724>
12. Evans R, Elwyn G, Edward A, Newcombe R, Kinnersley P, Wright P, et al. A randomised controlled trial of the effects of a web-based PSA decision aid, Prosdex. *Protocol. BMC Family Practice*. 2007;8:58.

- 1
  - 2
  - 3
  - 4
  - 5
  - 6
  - 7
  - 8
  - 9
  - 10
  - 11
  - 12
  - 13
  - 14
  - 15
  - 16
  - 17
  - 18
  - 19
  - 20
  - 21
  - 22
  - 23
  - 24
  - 25
  - 26
  - 27
  - 28
  - 29
  - 30
  - 31
  - 32
  - 33
  - 34
  - 35
  - 36
  - 37
  - 38
  - 39
  - 40
  - 41
  - 42
  - 43
  - 44
  - 45
  - 46
  - 47
  - 48
  - 49
  - 50
  - 51
  - 52
  - 53
  - 54
  - 55
  - 56
  - 57
  - 58
  - 59
  - 60
13. Holmes-Rovner MV, Valade D, Orlowski C, Draus C, Nabozny-Valerio B, Keiser S. Implementing shared decision-making in routine practice: Barriers and opportunities. *Health Expectations*. Blackwell Science Ltd; 2000;3(3):182–91.
14. Gravel K, Légaré F, Graham I. Barriers and facilitators to implementing shared decision-making in clinical practice: a systematic review of health professionals' perceptions. *Implementation Science*. 2006;1:16.
15. Elwyn G, Scholl I, Tietbohl C, Mann M, Edwards A, Clay K, et al. The implementation of patient decision support interventions into routine clinical practice: a systematic review. *Implementation Science*. 2012;In review.



Table 1 Web-based patient decision support hosted on NHS Direct

| Phase 1                                                          | Reasonable options considered                                                         | Evaluation Period     |
|------------------------------------------------------------------|---------------------------------------------------------------------------------------|-----------------------|
| Osteoarthritis (OA) of the knee (Sites 1, 2 and 3)               | Pain management, lifestyle change, manual therapy, joint injections, knee replacement | June – August 2010    |
| Benign Prostatic Hyperplasia (BPH) (sites 4,5,6,7,8)             | Active monitoring, surgical approaches, medication                                    |                       |
| Localised Prostate Cancer (LPC) (sites 4,5,6,7,8)                | Active monitoring, surgical approaches, medication                                    |                       |
| <b>Phase 2</b>                                                   |                                                                                       |                       |
| Amniocentesis (based on AmnioDex) (16)                           | No test, amniocentesis, chorionic villus sampling                                     | February – April 2011 |
| Breast Cancer (based on BresDex) (17)                            | Breast conservation surgery (lumpectomy) or mastectomy                                |                       |
| Test for prostate specific antigen (PSA) (based on ProsDex) (12) | No test, PSA test                                                                     |                       |

**Table 2** Patients use of the web-tools during phases 1 and 2

|                                                         | Number of patients directed | Number of patients accessing | Number using web tool for > 30 minutes |
|---------------------------------------------------------|-----------------------------|------------------------------|----------------------------------------|
| <b>Clinics in Phase 1 §</b>                             |                             |                              |                                        |
| Osteoarthritis (OA) of the knee, (Sites 1, 2 and 3)     | 162                         | 102 (63%)                    | 26 (16%)                               |
| Urology: Benign Prostatic Hyperplasia (sites 4,5,6,7,8) | Not known                   | 8                            | 2                                      |
| Urology: Localised Prostate Cancer (sites 4,5,6,7,8)    | Not known                   | 24                           | 5                                      |
| <b>Clinics in Phase 2</b>                               |                             |                              |                                        |
| 1 Amniocentesis                                         | 32                          | 20 (63%)                     | 11 (55%)                               |
| 2 Amniocentesis                                         | 25                          | 3 (12%)                      | 1 (33%)                                |
| 3 Amniocentesis                                         | 25                          | 3 (12%)                      | 1 (33%)                                |
| 4 Amniocentesis                                         | 32                          | 9 (28%)                      | 4 (44%)                                |
| 5 Amniocentesis                                         | 20                          | 3 (15%)                      | 1 (33%)                                |
| 6 Amniocentesis                                         | 10                          | 6 (60%)                      | 3 (50%)                                |
| 7 Amniocentesis                                         | 13                          | 10 (77%)                     | 5 (50%)                                |
| <b>All antenatal clinics</b>                            | <b>157</b>                  | <b>54/157 (34%)</b>          | <b>26/54 (48%)</b>                     |
| 1 Breast cancer                                         | 12                          | 1 (8%)                       | 1 (100%)                               |
| 2 Breast cancer                                         | 20                          | 0 (0%)                       | Not applicable                         |
| 3 Breast cancer                                         | 2                           | 0 (0%)                       | Not applicable                         |
| 4 Breast cancer                                         | 2                           | 0 (0%)                       | Not applicable                         |
| 5 Breast cancer                                         | Unknown                     | 2                            | 2 (100%)                               |
| 6 Breast cancer                                         | Unknown                     | 0                            | Not applicable                         |
| 7 Breast cancer                                         | Unknown                     | 1                            | 0 (0%)                                 |
| <b>All breast cancer clinics</b>                        | <b>36</b>                   | <b>4/36 (11%)</b>            | <b>3/4 (75%)</b>                       |

§ In phase 1, numbers are aggregated.

**Table 3** Interviews undertaken for each intervention

|                              | Number healthcare professionals interviewed |
|------------------------------|---------------------------------------------|
| <b>Intervention</b>          |                                             |
| Osteoarthritis of the knee   | 6                                           |
| Benign Prostatic Hyperplasia | 4                                           |
| Localised Prostate Cancer    | 5                                           |
| Amniocentesis                | 19                                          |
| Breast Cancer                | 23                                          |
| Prostate Specific Antigen    | 0                                           |
| <b>Total</b>                 | <b>57</b>                                   |

1  
2  
3  
4  
5  
6  
7  
8  
9  
10  
11  
12  
13  
14  
15  
16  
17  
18  
19  
20  
21  
22  
23  
24  
25  
26  
27  
28  
29  
30  
31  
32  
33  
34  
35  
36  
37  
38  
39  
40  
41  
42  
43  
44  
45  
46  
47  
48  
49  
50  
51  
52  
53  
54  
55  
56  
57  
58  
59  
60

Tuesday, 18 September 12

Dear Mr Sands

We have revised the article as requested.

We have addressed the very helpful comments of reviewer Johnston as follows:

1. What were the questions asked?

Response: We have clarified the questions we asked in the following paragraph:

*Interviews with health professionals:* After informed consent was obtained, semi-structured interviews were conducted with medical and nursing specialists responsible for implementing the intervention at each clinic. The respondents were asked their views about the web-based patient decision support and whether they had referred patients to them, we asked about the role they might play in their work. Interviews were conducted at the start, mid-point and end of the pilots, audio-recorded and transcribed. Results from the evaluation of the first phase led to a change of focus for the evaluation of the second phase.

2. Concern re patient data and recruitment.

Response: We agree that the data from patients is not as clear and we have therefore removed all mention of patient level data in this article.

3. The English language writing needs improvement. Box and table labels should provide a more clear description of the content.

Response: We have edited the paper to improve and have added clearer labels on box and tables.

4. The title is poor and should be revised.

Response: We have changed the title to:

**Why clinicians don't refer patients to online decision support tools? Interviews from front line clinics in the NHS.**

5. Other issues raised.

Response: We feel the reviewer has not appreciated that this was a pragmatic evaluation of a rapidly introduced set of NHS Direct web based tools. We were able to conduct qualitative semi-structured interviews with 57 NHS staff and the data are derived from these interviews. Coupled with the low patient visits to the online tools,

1  
2  
3 we are confident that we are representing the challenges of implementing web-based  
4 decision support tools for patients.  
5  
6

7 Response to reviewer Bennert that there was low uptake of the intervention and that  
8 patient recruitment was lacking.  
9

- 10  
11 1. I also agree with the authors' position that lack of interest by clinicians to be  
12 actively involved in this kind of research is itself a finding worth reporting.  
13

14  
15 Our response: we agree – and especially as they were volunteer clinics. The reaction  
16 in clinics that did not self-select to take part in such studies might be even more  
17 challenging. We do not now mention the patient level data and agree that is not  
18 robust enough to be included.  
19

20  
21 2. The research question was adapted in light of the poor referral and response  
22 rates. The findings confirm some of the known barriers to the implementation of  
23 DESIs. However the presentation of the findings from thematic analysis of interview  
24 data in the results section is poorly presented and organised in my view. Analysis  
25 stays descriptive and superficial and does not probe sufficiently into connections  
26 between themes. Some of the data extracts don't match well with the thematic  
27 headings under which they are discussed. For example, under theme 2: 'we already  
28 do sdm', clinicians seem to raise concerns about the extent to which genuine  
29 involvement is possible/desirable and the trade off between time spent with a tool  
30 vs time spent with clinicians. Perceptions of DESIs as complements vs replacements  
31 of consultation time would have been interesting to explore further here. Similarly,  
32 the theme 'organisational resistance' is too broad to be genuinely informative and  
33 glosses over the very different ethical and organisation concerns in different  
34 healthcare contexts that may prevent clinicians from fully embracing DESIs in their  
35 practice. The authors' interpretations in my view are not sufficiently grounded in  
36 the data presented. While I realise this may be partly due to space restrictions it is  
37 probably also a consequence of trying to generalise from a wide range of different  
38 clinical perspectives and contexts, at the cost of uncovering the more complex issues  
39 that may prevent referral and uptake of DESIs in each setting.  
40  
41  
42  
43  
44

45  
46 Our response: We have worked to tie the themes to the data. See examples in para  
47 below that show that the clinicians believe they are already providing patients with  
48 the opportunity to be engaged in decisions. Parallel literature from the patient  
49 perspective indicates clearly that patients do not share these views and wish to have  
50 both more information and more involvement in dec  
51  
52  
53  
54

55 **Theme 2 'We already do shared decision making'**  
56  
57  
58  
59  
60

1  
2  
3 The interviews revealed a widely held belief that decisions were already shared with  
4 patients and that this was occurring without the need for patient decision support. As  
5 one nurse commented, *"I don't know how much more they could be involved [in*  
6 *decisions]"* (antenatal screening nurse, clinic 7). An antenatal specialist stated that: *"...*  
7 *we moved away from the patriarchal ideal of telling people what to do 20 years ago"*  
8 (specialist, clinic 7). Many clinicians espoused the view that: *"... you wouldn't replace the*  
9 *time you spend with patients by giving them a decision tool ... and the shared decision*  
10 *making process ... isn't dependent on having this kind of tool"* (breast care nurse, clinic  
11 4).  
12  
13  
14  
15

16  
17 After all, 'limited motivation' as a theme does not really explain anything! On the  
18 other hand, the amniocentesis intervention appears as a 'deviant case' with far  
19 better referral and uptake than the other interventions, so it would have been  
20 desirable to explore in greater depth what were the facilitating factors in this  
21 context. In short, I feel that by spreading their analysis very thinly across so many  
22 different healthcare contexts, the authors have robbed themselves of the chance to  
23 say something novel and more informative about barriers to the use of DESis in  
24 specific contexts. None of the themes are surprising but they are insufficiently  
25 elaborated to form a basis for key messages about how to tackle change.  
26  
27  
28  
29

30 Our response: We have worked to give our analysis more depth and have included more  
31 relevant quotes. We disagree that we are not saying anything novel. Very few studies  
32 have reported real life efforts to implement web-based tools (we have reviewed them  
33 all (article under review) and cite that in this new version.  
34  
35  
36  
37  
38  
39  
40

41 Dear Dr. Elwyn:  
42

43 Manuscript ID bmjopen-2012-001530 entitled "Why don't NHS healthcare professionals  
44 recommend patients use web-based decision support tools? Interviews from the front  
45 line." which you submitted to BMJ Open, has been reviewed. The comments of the  
46 reviewer(s) are included at the bottom of this letter.  
47  
48

49 The reviewer(s) have recommended revisions to your manuscript. Therefore, I invite you  
50 to respond to the reviewer(s)' comments and revise your manuscript. Please remember  
51 that the reviewers' comments and the previous drafts of your manuscript will be  
52 published as supplementary information alongside the final version.  
53  
54

55 To revise your manuscript, log into <http://mc.manuscriptcentral.com/bmjopen> and  
56 enter your Author Center, where you will find your manuscript title listed under  
57  
58  
59  
60

1  
2  
3 "Manuscripts with Decisions." Under "Actions," click on "Create a Revision." Your  
4 manuscript number has been appended to denote a revision.  
5  
6

7 You may also click the below link to start the revision process (or continue the process if  
8 you have already started your revision) for your manuscript. If you use the below link  
9 you will not be required to login to ScholarOne Manuscripts.  
10

11 [http://mc.manuscriptcentral.com/bmjopen?URL\\_MASK=wSsjc863d3Qk3mtfC4Bh](http://mc.manuscriptcentral.com/bmjopen?URL_MASK=wSsjc863d3Qk3mtfC4Bh)  
12  
13

14  
15  
16 You will be unable to make your revisions on the originally submitted version of the  
17 manuscript. Instead, revise your manuscript using a word processing program and save  
18 it on your computer. Please also highlight the changes to your manuscript within the  
19 document by using the track changes mode in MS Word or by using bold or colored  
20 text. Once the revised manuscript is prepared, you can upload it and submit it through  
21 your Author Center.  
22  
23

24  
25 When submitting your revised manuscript, you will be able to respond to the comments  
26 made by the reviewer(s) in the space provided. You can use this space to document any  
27 changes you make to the original manuscript. In order to expedite the processing of the  
28 revised manuscript, please be as specific as possible in your response to the  
29 reviewer(s).  
30  
31

32 **IMPORTANT:** Your original files are available to you when you upload your revised  
33 manuscript. Please delete any redundant files before completing the submission.  
34  
35

36 Because we are trying to facilitate timely publication of manuscripts submitted to BMJ  
37 Open, your revised manuscript should be submitted within 30 days. If it is not possible  
38 for you to submit your revision by this date, we may have to consider your paper as a  
39 new submission.  
40  
41

42 Once again, thank you for submitting your manuscript to BMJ Open and I look forward  
43 to receiving your revision.  
44  
45

46 Sincerely,  
47 Mr. Richard Sands  
48 Managing Editor, BMJ Open  
49 [rsands@bmjgroup.com](mailto:rsands@bmjgroup.com)  
50  
51

52 Reviewer(s)' Comments to Author:  
53  
54

55  
56 Reviewer: Janice Johnston  
57 Associate Professor  
58  
59  
60



1  
2  
3 School of Public Health  
4 University of Hong Kong  
5 Hong Kong  
6 I have no competing interests  
7  
8  
9

10 The participants are not described except in very general terms. What is the age,  
11 gender, years of experience of the clinical staff/patients? Who are the interviewed  
12 clinical staff? This should be in a table form.  
13

14 The guided interview questions should be included. How were the questions derived -  
15 ie. What informed these research questions?  
16 What is the format of the web log data. How accurate is this data? How could this data  
17 be used as an alternative outcome variable?  
18 How were patients recruited? As patients from phase 2 were not recruited - the study is  
19 incomplete and the reliability of the conclusions drawn very limited. This is a 'failed'  
20 process and as such may be very informative for future research. This should be fully  
21 discussed and the limitations clarified. The authors should provide concrete suggestions  
22 on how to improve the recruitment in future work of this type. \  
23 How were the surveys constructed and validated? - If not validated this raises a  
24 significant scientific criticism for this study.  
25  
26  
27  
28

29 The english language writing needs improvement. Box and table labels should provide a  
30 more clear description of the content.  
31  
32

33 The title is poor and should be revised.  
34  
35

36 Given the methodological problems - the results are not able to answer the research  
37 question except in the negative and may not be credible. This should be fully discussed.  
38 In some qualitative papers the results and discussion sections are merged. This would be  
39 appropriate for this paper as the discussion section is somewhat repetitive of the  
40 results.  
41

42 What is credible and trustworthy in a qualitative study? This needs to be discussed here  
43 and the authors need to provide justification as to why the results are valid and  
44 meaningful.  
45

46 Prior research should inform the discussion of the results.  
47  
48

49 I am not sure if this is a major revision or a reject as it is unclear at present how the  
50 authors can address the comments above. I will leave this decision to the editors.  
51  
52

53 Reviewer: Dr Kristina Bennert  
54 Senior Qualitative Researcher  
55 Department of Primary Health Sciences  
56 University of Oxford  
57  
58  
59  
60

1  
2  
3 and  
4 Research Associate  
5 School of Social and Community Medicine  
6 University of Bristol  
7 UK  
8  
9 no competing interests  
10

11  
12 This is a mixed methods study reporting clinician and patient views on DESIs in six  
13 different healthcare contexts. No statistical methods were used. Instead, numbers and  
14 percentages of patients directed to DESIs, accessing DESIs and using them for >30 min  
15 are reported.

16  
17 The authors themselves highlight the difficulties they had in collecting qualitative  
18 interview data from clinicians and patients in a systematic fashion, so sampling was  
19 uneven and patchy. No patients were interviewed for 3 of the 6 examined contexts and  
20 no clinician views could be elicited for one condition. Exclusion/inclusion criteria are  
21 insufficiently described, e.g. not clear whether all patients referred or only those  
22 accessing/using were approached for interview, and which clinicians were  
23 approached/selected for interview and why. In the thematic analysis of the results  
24 section, quotes are mostly too short and insufficiently contextualised with the results of  
25 the overall analysis and participants are insufficiently identified to judge whether the  
26 articulated views can be regarded as representative for the health context or for  
27 clinicians'/patients' views of DESIs at large. While the study was well-designed, the poor  
28 response in my view has severely hampered the representativeness of the qualitative  
29 data obtained. However, I also agree with the authors' position that lack of interest by  
30 clinicians to be actively involved in this kind of research is itself a finding worth  
31 reporting.  
32  
33  
34  
35  
36

37  
38 The research question was adapted in light of the poor referral and response rates. The  
39 findings confirm some of the known barriers to the implementation of DESIs. However  
40 the presentation of the findings from thematic analysis of interview data in the results  
41 section is poorly presented and organised in my view. Analysis stays descriptive and  
42 superficial and does not probe sufficiently into connections between themes. Some of  
43 the data extracts don't match well with the thematic headings under which they are  
44 discussed. For example, under theme 2: 'we already do sdm', clinicians seem to raise  
45 concerns about the extent to which genuine involvement is possible/desirable and the  
46 trade off between time spent with a tool vs time spent with clinicians. Perceptions of  
47 DESIs as complements vs replacements of consultation time would have been  
48 interesting to explore further here. Similarly, the theme 'organisational resistance' is too  
49 broad to be genuinely informative and glosses over the very different ethical and  
50 organisation concerns in different healthcare contexts that may prevent clinicians from  
51 fully embracing DESIs in their practice. The authors' interpretations in my view are not  
52 sufficiently grounded in the data presented. While I realise this may be partly due to  
53 space restrictions it is probably also a consequence of trying to generalise from a wide  
54 range of different clinical perspectives and contexts, at the cost of uncovering the more  
55  
56  
57  
58  
59  
60

1  
2  
3  
4 complex issues that may prevent referral and uptake of DESIs in each setting. After all,  
5 'limited motivation' as a theme does not really explain anything! On the other hand, the  
6 amniocentesis intervention appears as a 'deviant case' with far better referral and  
7 uptake than the other interventions, so it would have been desirable to explore in  
8 greater depth what were the facilitating factors in this context. In short, I feel that by  
9 spreading their analysis very thinly across so many different healthcare contexts, the  
10 authors have robbed themselves of the chance to say something novel and more  
11 informative about barriers to the use of DESIs in specific contexts. None of the themes  
12 are surprising but they are insufficiently elaborated to form a basis for key messages  
13 about how to tackle change.  
14  
15

16  
17 I think this is a very worthwhile and important study to publish. I have read it with great  
18 interest and hope that my comments will be helpful in sharpening the focus and  
19 explanatory power of the thematic analysis.  
20  
21  
22  
23  
24  
25  
26  
27  
28  
29  
30  
31  
32  
33  
34  
35  
36  
37  
38  
39  
40  
41  
42  
43  
44  
45  
46  
47  
48  
49  
50  
51  
52  
53  
54  
55  
56  
57  
58  
59  
60

1  
2  
3  
4  
5  
6  
7 **Why don't NHS healthcare professionals/clinicians don't refer/recommend patients use to**  
8 **online/web-based decision support tools? Interviews from the front line clinics in the NHS front**  
9 **line.**

Formatted: Font color: Auto

10 Glyn Elwyn, Andrew Rix, Tom Holt, Deborah Jones

11  
12  
13  
14  
15 **Cochrane Institute of Primary Care and Public Health**  
16 **Neuadd Meirionydd**  
17 **School of Medicine**  
18 **Cardiff University**  
19 **Heath Park**  
20 **United Kingdom**  
21 **CF14 4YS**

22  
23 Glyn Elwyn, professor, [elwyng@cardiff.ac.uk](mailto:elwyng@cardiff.ac.uk)

24 Andrew Rix, independent researcher, [andrewrixhome@gmail.com](mailto:andrewrixhome@gmail.com)

25 Tom Holt, independent researcher, [tbholt1@gmail.com](mailto:tbholt1@gmail.com)

26 Deborah Jones, independent researcher, [deb.jns64@gmail.com](mailto:deb.jns64@gmail.com)

27  
28  
29 **Address for correspondence:** Glyn Elwyn - [glynelwyn@gmail.com](mailto:glynelwyn@gmail.com)

30  
31 **Keywords:** patient decision support, decision aids, shared decision making, patient centred care,  
32 informed consent.

33  
34 The Corresponding Author has the right to grant on behalf of all authors and does grant on behalf of all  
35 authors, an exclusive licence (or non exclusive for government employees) on a worldwide basis to the  
36 BMJ Publishing Group Ltd to permit this article (if accepted) to be published in BMJ editions and any  
37 other BMJ PGL products and sublicences such use and exploit all subsidiary rights, as set out in our  
38 licence.

39 All authors have completed the Unified Competing Interest form  
40 [http://www.icmje.org/coi\\_disclosure.pdf](http://www.icmje.org/coi_disclosure.pdf) (available on request from the corresponding author) and  
41 declare: no support from any organisation for the submitted work [or describe if any]; no financial  
42 relationships with any organisations that might have an interest in the submitted work in the previous  
43 three years [or describe if any], no other relationships or activities that could appear to have influenced  
44 the submitted work [or describe if any].

Formatted: Font color: Auto

## Summary

### Focus

- Research studies demonstrate that engaging patients in the use of decision support (decision aids) is beneficial but ~~there are significant challenges to their implementation into practice~~ ~~take up is low~~
- Clinicians are in a position to advocate the use of ~~patient~~ decision support ~~by~~ but do not appear to do so.

### Key messages

- Reluctance to ~~point refer~~ patients ~~in the direction of~~ decision support is ~~largely~~ based on ~~the scepticism of a complex mixture of~~ professionals ~~that these tools add value, coupled with attitudes, difficulties in of~~ incorporating the tools into existing work ~~patterns flows~~ and competing organisational pressures, such as targets
- This reluctance will not be overcome simply by ~~making placing more~~ tools ~~available and more accessible on the web~~
- When appropriately directed, a significant number of patients do use the decision support and say they find them useful.

### Strengths and Limitations

- The evaluation study upon which these results are based set out to explore patterns of usage but turned to examine why take up was lower than expected
- ~~The evidence comes mainly from 57 qualitative interviews with healthcare professionals taking part in the introduction of six web-based decision support tools hosted on the NHS Direct website~~
- ~~Low take up reduced the opportunity to obtain evidence from patient users.~~

**Formatted:** Font: Arial Narrow, 12 pt

**Formatted:** List Paragraph, Bulleted + Level: 1 + Aligned at: 0.25" + Indent at: 0.5"

**Formatted:** Font color: Auto

1  
2  
3  
4  
5  
6  
7  
8  
9  
10  
11  
12  
13  
14  
15  
16  
17  
18  
19  
20  
21  
22  
23  
24  
25  
26  
27  
28  
29  
30  
31  
32  
33  
34  
35  
36  
37  
38  
39  
40  
41  
42  
43  
44  
45  
46  
47  
48  
49  
50  
51  
52  
53  
54  
55  
56  
57  
58  
59  
60

|

For peer review only

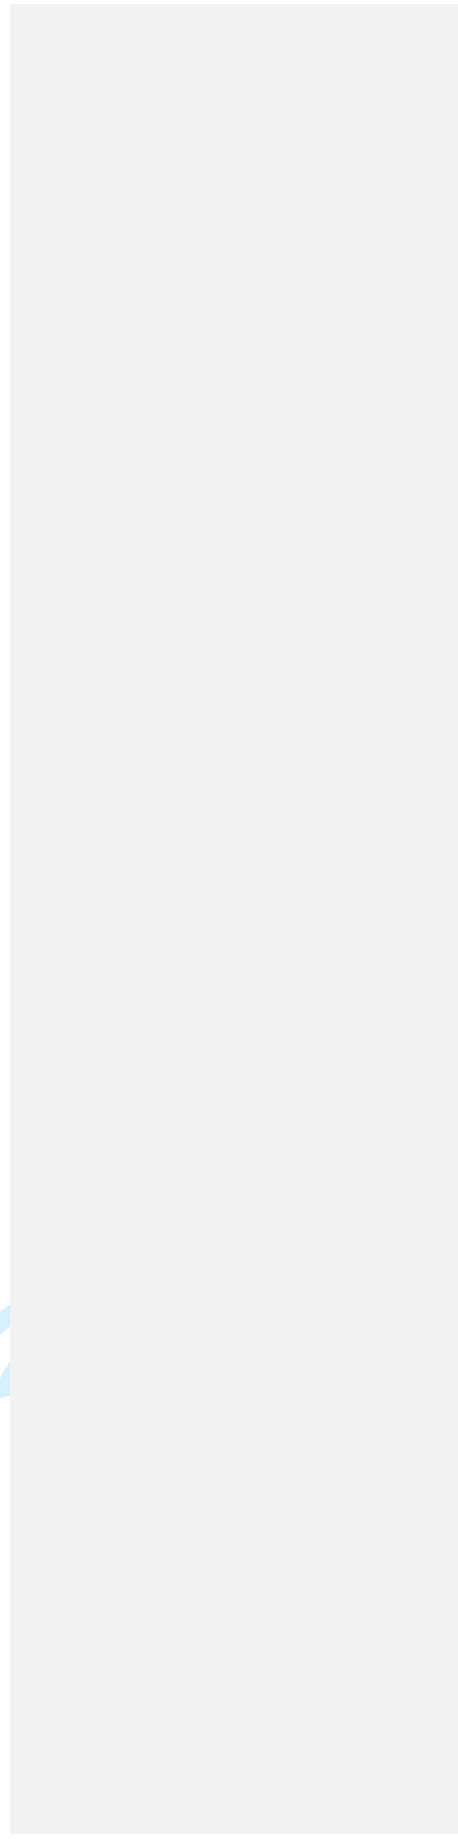

## Abstract

**Objective:** To assess whether clinical teams would direct patients to use web-based patient decision support interventions (DESIs) and whether patients would use them.

**Design:** ~~Mixed methods using concurrent and R~~retrospective semi-structured interviews and web server log analysis ~~and surveys~~.

**Participants and settings:** 57 NHS professionals (nurses, doctors and others) in orthopaedic, antenatal, breast, urology clinics and in primary care practices ~~and 10 patients~~ across 22 NHS sites given access to DESIs hosted on the NHS Direct web-site.

**Results:** Fewer than expected patients were directed to use the web tools. The most significant obstacles to referral to the tools were the attitudes of clinicians and clinical teams. Technical problems ~~partly~~ contributed to the problems but the low uptake was mainly explained by clinicians' limited understanding of how ~~patient they DESIs should could be helpful be located~~ in clinical pathways, their perception that 'shared decision making' was already commonplace and that in their view, some patients are resistant to being involved in treatment decisions. External factors, such as efficiency targets and 'best practice' recommendations were also cited as having a significant being significant barriers. negative influence on clinicians' decisions to refer. Clinicians did not feel the need to direct refer patients to use decision support tools, web-based or not, and, as a result, felt no requirement to change existing practice routines. ~~However, the data also showed that many patients, when directed to these tools, were willing to access and use them and found them helpful~~. Uptake is highest when clinicians set expectations that these tools are integral to practice and embed their use into clinical pathways.

**Conclusions:** ~~Existing~~ evidence of patient benefit and the free availability of from a Cochrane review and making patient DESIs freely available via the web are not sufficient drivers to guarantee achieve routine use. ~~Changes are needed in attitudes and skills as well as system support to reach organisation-wide agreement about the role of these interventions and their location in clinical pathways. Health professionals were not motivated to refer patients to these interventions. Clinicians will not use these interventions simply because they are made available, despite good evidence of benefit to patients. These attitudes are deep seated and will not be modified by solely developing web-based interventions: a broader strategy will be required to embed DESIs into routine practice.~~

**Words:** 284

**Article words:** 3153

Formatted: Font color: Auto

Formatted: Font color: Auto



## Introduction

Are clinical teams willing to ask patients to use decision support interventions, when hosted on the web? A decade of research has demonstrated consistent positive outcomes when patient decision support interventions, often called decision aids, are evaluated in randomised controlled trials (1). Use of these interventions is advocated in order to help achieve shared decision making – where patients and clinicians work together to arrive at decisions that best match the informed patient preference (2). These interventions typically consider clinical situations where there are reasonable alternatives. Typical examples are whether to proceed to a total knee replacement or use alternative treatments or whether to accept or decline an amniocentesis, a procedure that runs the risk of leading to a miscarriage. When these interventions are used, patient knowledge increases, risk perceptions are more accurate, patients feel more actively involved in decisions and often tend to make more conservative choices, especially when considering discretionary surgery (1).

Despite good evidence and **increasing** policy support, studies have revealed resistance to the implementation of shared decision making and decision support (3). Professionals often hold the view that they 'already do' shared decision making, that the interventions promoted lack applicability to individual patients and that there is insufficient time to involve patients in decisions (4). To date, only a few studies have addressed the use of implementing these interventions in routine clinical settings (5). Many obstacles have been described and it is too early to say whether the benefits observed in randomised trials can be replicated. (6) **(Francis Légaré et al., 2010)**. As yet, there has been no large scale study to assess the uptake possible in pragmatic settings (7).

Responding to the potential benefits of shared decision making and the use of patient decision support, the NHS in England invested approximately £1.5M in 2009-10 creating a platform of web-based patient decision support, as part of an England-wide shared decision making programme. NHS Direct was commissioned by the East of England Strategic Health Authority to adapt, host and pilot the introduction of web-based decision support interventions into the NHS, as part of the Quality Innovation, Performance and Prevention Programme.

A multi-phase programme of work was proposed, with the aim of creating an easily accessed web-based set of patient decision support tools hosted on an NHS web-platform coupled with telephone support (2). An external evaluation was set up to assess whether clinical teams would direct patients to these tools and to assess uptake and use. **This article reports on the attitudes of participating staff which lie behind the reluctance to refer patients to these tools. This article reports the main findings of the evaluation, based on web-server logs and interviews with clinical staff.**

Formatted: Font color: Auto, Highlight

Formatted: Font color: Auto

Formatted: Font color: Auto

## Methods

Two phases were planned. In each phase, three web interventions were adapted and hosted on NHS Direct's website. NHS sites were recruited into evaluation pilots of approximately three-month's duration – see Table 1.

In phase 1, the three interventions were adaptations of programmes originally developed by the Foundation for Informed Decision Making, Boston (see Table 1). The prostate web interventions were originally produced in DVD versions and had been previously introduced into some clinics in England (8)(9).

Eight NHS clinics, across England, some with previous involvement in the development of the DVD and web-based versions, agreed to introduce patients to them. For the knee condition, patients referred to secondary care were identified by staff ~~at the relevant clinics~~ and directed to access the web-based tools to read information about a range of treatment options, e.g. physiotherapy, injections and knee replacement. If patients completed the use of the web tool, a personalised summary was generated that listed their preferred treatment. Patients were asked to either print this summary or, when they attended their next clinic appointment, to ask for the summary to be discussed with them. It had been estimated that 360 patients across three clinics would be eligible to use the knee osteoarthritis web intervention during the evaluation period. Similar methods were applied to the web tools for BHP and LPC.

In phase 2, three interventions were adapted from tools developed at Cardiff University (~~see~~ Table 1). Data was collected from 7 breast cancer and 7 antenatal outpatient clinics recruited by NHS Direct (Table 2). Estimates of patients potentially eligible for these tools had been set at 50 per site, a pool of around 700 patients. Primary Care Trusts in England were asked to contact primary care practices, alerting clinicians to the availability of the PSA decision support tool.

## Data Collection

Data was collected in each phase for a maximum of 14 weeks using the following methods:

*Referral data:* In both phases, clinics kept a record of patients directed to use the tools. Patients were given unique access codes, enabling anonymised tracking of server web logs.

*Web logs:* web server log data was collected, tracking access (content and duration) of each web page viewed.

*Interviews with health professionals:* After informed consent was obtained, semi-structured interviews were conducted with medical and nursing specialists responsible for implementing the intervention at each clinic. The respondents were asked their views about the web-based patient decision support and whether they had referred patients to them, we asked about ~~the role they might play in their work.~~ Interviews were conducted at the start, mid-point and end of the pilots, audio-recorded and transcribed. Results from the evaluation of the first phase led to a change of focus for the evaluation of the second phase.

~~*Patient interviews and surveys:* Short survey tools addressed questions about usability and assessed knowledge about the relevant condition. Patients also consented to a semi-structured telephone interview about their experience of using the site.~~

Formatted: Font color: Auto

*Data analysis:* Web server log data were verified, cleaned and analysed by TH. AR and DJ coded the interviews independently, meeting to agree coding frames, prior to jointly categorising the data into themes related to clinician views about the decision support tools and their willingness to direct patients to them.

## Results

*Patient's access and use:* Records indicate that 162 of the estimated potential pool of 360 patients were offered access to the OA knee tool: 102 of the 162 visited (63%) visited the site, at least briefly. A total of 38 (23%) provided some information; 27 patients (26%) used the site in sufficiently to produce a summary sheet that could be used in a future clinic appointment. This number represents 7% of those estimated to have been eligible. No estimates were available for eligible patients in relation to BPH and LPC, or for numbers directed to the sites. Web log data showed 24 and 8 unique visitors to the LPC and BPH sites respectively, resulting in 5 and 2 patients using the sites from introductory pages to summary page, answering all questions.

To compensate for the unexpected access rates in phase one, the number of participating clinics planned for phase two was increased. Based on attendance rates, 700 patients had been considered eligible (50 at each of 14 clinics). The actual uptake was less than expected: 157 patients were directed to the amniocentesis web tool and 36 patients were directed to the breast cancer tool (data were only available from four of the seven breast clinics) (Table 2). Data about the number of patients directed to the PSA website from primary care were not available.

Table 2 also describes considerable variation between clinics in the number of patients who accessed the tool. Three of the antenatal clinics had access rates of 60% or higher; all the other antenatal clinics had access rates of 28% or lower. Having gained access, 26/54 (48%) patients viewed the amniocentesis site for 30 minutes or more, indicating significant levels of interest after overcoming the access hurdle. These data suggest that high proportion of patients will potentially access and use decision support tools: how best to motivate professionals to direct patients to these interventions is a challenge.

*Interviews with health professionals:* During phases 1 and 2, 57 interviews were conducted with health care professionals, across all sites, (see Table 3). Interviews in phase 2 focused on examining reasons for the unexpected low number of patients directed to use the decision support tools and what steps might be helpful in embedding patient decision support into routine practice. Analysis of the interviews revealed overall resistance to directing patients to use decision support. This resistance arose from existing professional attitudes and to barriers arising from current organisational routines. Box 1 illustrates the main themes found in the data:

### Box 1 Summary of themes derived from the qualitative analysis

| Theme                                                 | Summary                                                                                                                                                                                |
|-------------------------------------------------------|----------------------------------------------------------------------------------------------------------------------------------------------------------------------------------------|
| 1. Limited motivation to use patient decision support | Low motivation for the intended role of patient decision was encountered, as illustrated by uncertain deployment of the tools in clinical pathways and low uptake <i>by patients</i> . |
| 2. 'We already do shared decision making'             | Strong perception that clinicians were already involving patients in decisions, therefore no perceived need to change or to adopt decision support by adapting pathways                |
| 3. Perceived patients' barriers to                    | Clinicians cited barriers such as technical access problems                                                                                                                            |

Formatted: Font color: Auto

Formatted: Font color: Auto

Formatted: Font color: Auto, English (U.S.)

Formatted: Font color: Auto

Formatted: Font color: Auto

1  
2  
3  
4  
5  
6  
7  
8  
9  
10  
11  
12  
13  
14  
15  
16  
17  
18  
19  
20  
21  
22  
23  
24  
25  
26  
27  
28  
29  
30  
31  
32  
33  
34  
35  
36  
37  
38  
39  
40  
41  
42  
43  
44  
45  
46  
47  
48  
49  
50  
51  
52  
53  
54  
55  
56  
57  
58  
59  
60

|                                                                                 |                                                                                                                                                                   |
|---------------------------------------------------------------------------------|-------------------------------------------------------------------------------------------------------------------------------------------------------------------|
| involvement in decision making                                                  | and often saw patients as those that did not want to be involved in shared decision making or as those they felt had already accessed information on the internet |
| <b>4. Organisational resistance to patient's involvement in decision making</b> | External efficiency targets and health professionals' views about effective treatments were barriers                                                              |

Formatted: Font color: Auto

Formatted: Font color: Auto

For peer review only

### Theme 1 Limited motivation to use patient decision support

The majority of key professionals, specialists, nurses and managers, had been invited to brief introductions about the websites and had been sent an information pack. However, interviews revealed that many clinicians had not fully understood the intended role of the tools, ~~often ascribed to difficulty attending key meetings. Delays in the launch of the tools meant that professionals had not seen the websites, and were therefore uncertain about the content and also where exactly to position them in their clinical pathways.~~

Ideally, decision support tools should be used by patients when diagnosis and treatment options are confirmed. In urology, this is after urine flow dynamics or biopsies have provided a diagnosis; in knee clinics, this is after osteoarthritis has been confirmed as the likely cause of pain. However, many clinicians saw these tools as ~~merely means for providing information and not as ways of engaging patients in discussions about treatment discussionsdecisions, provided they did not disrupt clinical workflows.~~ Clinicians reported being happy with: "... anything that makes the patient genuinely more knowledgeable ..." (orthopaedic surgeon, site 3, phase 1). ~~However, but~~ the concept that patients should use these tools to engage in decisions was not widely understood: "Having a summary sheet is fine for the patient but don't expect me to use it ... it would interfere with what I do, although I can see it might lead to less questions – which is good" (orthopaedic surgeon, site 2, phase 1).

Formatted: Font color: Auto

Formatted: Font color: Auto

Formatted: Font color: Auto

Formatted: Font: Not Italic

Formatted: Font color: Auto

### Theme 2 'We already do shared decision making'

The interviews revealed a widely held belief that decisions were already shared with patients and that this was occurring without the need for patient decision support. As one nurse commented, "I don't know how much more they could be involved [in decisions]" (antenatal screening nurse, clinic 7). An antenatal specialist stated that: "... we moved away from the patriarchal ideal of telling people what to do 20 years ago" (specialist, clinic 7). Many clinicians espoused the view that: "... you wouldn't replace the time you spend with patients by giving them a decision tool ... and the shared decision making process ... isn't dependent on having this kind of tool" (breast care nurse, clinic 4).

### Theme 3 Perceived patient barriers to involvement in decision making

Patients' inability to access the Internet was often raised. "You wonder if they've got access, especially to broadband ..." (specialist nurse, site 4, phase 1) and that: "This generation are not used to getting information in this way" (specialist nurse, site 6, phase 1). Clinicians also gave examples of patients resisting involvement in decisions. A surgeon reported one woman saying, "I'll do whatever you say. You tell me to have a mastectomy, I'll have a mastectomy ..." (breast surgeon, clinic 4). A breast care nurse commented, "... most women... say 'you make the decision for me ... it's much easier if you tell me what I have to have done'" (breast care nurse, clinic 4). Patients were often categorised as either "sufficiently informed" or misinformed, "clutching internet printouts" (breast surgeon, clinic 3). The prevailing view among interviewees was to accept, that, "there is a role for your website but that cohort is very narrow ..." (breast surgeon, clinic 1).

### Theme 4 Organisational resistance to patient's involvement in decision making

External targets were often cited as barriers. Meeting efficiency targets, particularly in cancer, led to constant pressures. As a specialist explained, the constant pressure to "get to a decision" quickly means that clinicians do not "... want to encourage indecisive patients go off [to read a web tool], and then ... come back and see us for another consultation" (breast surgeon, clinic 1).

1  
2  
3  
4  
5  
6  
7 Many clinicians were explicit that they would not direct patients to tools that do not support their own  
8 views about effective treatments. For example, the breast cancer tool lists mastectomy and breast  
9 conservation surgery as treatments that should both be given consideration by women who have early  
10 breast cancer. Yet, many clinics have a different ethos. As one surgeon stated: "*We obviously try to do*  
11 *breast conservation whenever we can. That's the basic premise...*" (breast surgeon, clinic 1). This  
12 attitude is supported by external audits, where high mastectomy rates are viewed as inappropriate.

13  
14 Routines were perceived as already being under pressure and so asking "... a midwife to give  
15 *[information about a web tool] was yet another thing ...*" (antenatal screening coordinator, clinic 1).  
16 Existing processes were viewed as being satisfactory: "*I would say that what we're doing is actually*  
17 *fine*" (screening midwife, clinic 4) and that the website's "*information does not make women's decision*  
18 *about amniocentesis any easier*" (specialist, clinic 7). In short, it was felt that sufficient information was  
19 already available: most clinics did not see the websites as adding value to their work, and therefore saw  
20 no need for change. Nevertheless, three antenatal clinics achieved relatively high uptake rates, more  
21 importantly perhaps, access rates of 60% or higher (clinics 1, 6 and 7 – see Table 2). Interviews  
22 revealed that these three clinics had specifically modified their pathways and were alerting women by  
23 telephone about the tool at the same time as giving them their 'high risk' result and offer of  
24 amniocentesis. Women at clinic 7 were encouraged to access the website before attending their  
25 amniocentesis counselling session. Where the tools are integrated into routines, and expectations set  
26 that patients will use them before making decisions, different patterns of use emerge.

### 27 *Patient interviews and survey*

28 ~~Ten patients in phase 1 volunteered for telephone interview (Table 3). These patients were positive~~  
29 ~~about the balanced information about treatment options and were satisfied with the clarity of the~~  
30 ~~website. Technical problems were confirmed. Patients also reported unmet expectations—that having~~  
31 ~~become informed, it was disappointing to meet clinicians who were unwilling to involve them in decision~~  
32 ~~making. In phase 1, 45 patients responded to the survey: 84% were very positive about the usefulness~~  
33 ~~of the site, and 85% very positive about the ease of use, 76% were more positive about their upcoming~~  
34 ~~outpatient appointment and 69% said that viewing had made a difference to their decision about~~  
35 ~~treatment. In open comments, patients emphasised the advantage of being recommended high quality~~  
36 ~~information that was available when it suited them, as one respondent said: "...in my own time, in my~~  
37 ~~own space and at my own pace". No volunteers for interviews or responses to surveys were received in~~  
38 ~~phase 2.~~

### 39 **Discussion**

40  
41 *Principal Findings:* This evaluation demonstrates that the implementation of patient decision support  
42 into routine practice is unlikely to be accomplished by the development of web-based tools alone: the  
43 relatively low uptake of the tools was explained by clinicians' uncertainty about the content and also  
44 where exactly to position them in their clinical pathways, their perception that 'shared decision making'  
45 was already commonplace in their teams. A minority also felt that patients, on the whole, are resistant  
46 to engaging in decisions. In addition, there was evidence that external factors, such as efficiency  
47 targets and 'best practice' recommendations, are viewed as have more influence in driving decisions  
48 than the informed preferences of patients.

49  
50 In short, clinicians did not feel the need to direct patients to use decision support tools, web-based or  
51 not, and, as a result, felt no requirement to change existing routines. Taken together, these views  
52 represent significant barriers and explain why, in most of the clinics, few patients were directed to use  
53 the tools.



1  
2  
3  
4  
5  
6  
7 It was encouraging however to notice that the data revealed that many patients, when directed to these  
8 tools, are willing to use them, ~~and find them helpful~~. Uptake is highest when clinicians set expectations  
9 that these tools are integral to practice and embed their use into clinical pathways.

10 *Strengths and weakness of methods:* The strengths of the study are the pragmatic use of routine NHS  
11 settings, the purposive sampling of those who had been **actually** tasked to introduce patients to these  
12 web-based decision support tools. ~~The, and the~~ use of web server logs to track access ~~—so~~  
13 ~~that provides direct data about the~~ actual use of the tools ~~could be tracked~~. Constraints were placed on  
14 the ~~intensity of the~~ evaluation processes by the tight service delivery timetables ~~imposed set~~ by the  
15 NHS sponsor.

16  
17 Although relevant clinicians were interviewed in all sites, the sample could have been expanded if more  
18 time had been available. ~~A weakness of the study is the lack of patient interviews in the second~~  
19 ~~evaluation phase, attributable to low uptake of the tools~~. Although the study sheds some light on some  
20 the implementation barriers, further work is needed into understand how to identify patients that would  
21 benefit from being asked to use decision support, i.e. to determine the eligible numbers in any given  
22 clinical pathway as a way of establishing the denominator population for assessing uptake.

23 *Results in context of other similar work:* Previous work on web-based patient decision support  
24 interventions has been typically undertaken in the context of randomised trials (1) and so it is difficult to  
25 draw comparisons to this pragmatic implementation study. Nevertheless, existing research studies do  
26 illustrate high degrees of difficulty in recruiting patients to use web-based interventions, even with  
27 dedicated resources and incentives (10)(11)(12). Holmes Rovner documented a decade ago that  
28 engaging clinicians to direct patients to use decision support tools active participants was a significant  
29 barrier to implementation (13). Caldon also documented of the concerns and anxieties of health  
30 professionals about patient decision support, such as the threat to clinical autonomy, the fear of more  
31 demanding patients and suspicion that the content was did not accord with their personal practice (4).  
32 These findings are echoed by recent reviews (14)(6)(15).

33  
34 *Implications:* As recently noted by Coulter (7), addressing the implementation challenge will require  
35 efforts targeted at changing hearts, minds and systems. More preparation and training might be helpful  
36 but future work will also need to work on achieving organisation-wide agreement about the role of these  
37 interventions and their location in clinical pathways.

38  
39  
40 **Funding and Ethical Approval:** NHS Direct were commissioned by the East of England Strategic Health Authority to adapt,  
41 host and evaluate the use of patient decision support in England. NHS Direct provided funding for the evaluation,  
42 considered the evaluation under their research governance process and given the service evaluation nature of the study,  
43 decided that ethical approval was not required. NHS Direct had no involvement in the drafting of this article.

44 **Acknowledgements:** We acknowledge the support and advice of the following people. Marie Anne Durand, at the time  
45 Programme Manager of the UK SDM Programme, Steven Laitner, SDM Programme Lead, Nick Chapman, Chief Executive  
46 Officer NHS Direct and Shirley Large, Head of Research NHS Direct.

47 **Contributorship:** GE and AR designed the evaluation; AR and DJ undertook the interviews and conducted the qualitative  
48 analysis. TH undertook the quantitative analysis of the web log data. GE drafted the manuscript and is the guarantor and all  
49 authors contributed to the writing and editing process.

50 **Data sharing:** There is no additional data available.

Formatted: Font color: Auto



## References

1. Stacey D, Bennett C, Barry M, Col N, Eden K, Holmes-Rovner M, et al. Decision aids for people facing health treatment or screening decisions. *Cochrane Database of Systematic Reviews*. 2011;(10):CD001431.
2. Elwyn G, Coulter A, Laitner S, Walker E, Watson P, Thomson R. Implementing shared decision making in the NHS. *BMJ*. 2010 Jan;341:c5146.
3. Légaré F, Ratté S, Gravel K, Graham ID. Barriers and facilitators to implementing shared decision-making in clinical practice: update of a systematic review of health professionals' perceptions. *Patient Education and Counseling*. 2008 Dec;73(3):526–35.
4. Caldon L, Collins K, Reed M, Sivell S, Austoker J, Clements A, et al. Clinicians' concerns about decision support interventions for patients facing breast cancer surgery options: understanding the challenge of implementing shared decision-making. *Health Expectations*. Blackwell Publishing Ltd; 2010;14(2):133–46.
5. Feibelmann S, Yang TS, Uzogara EE, Sepucha K. What does it take to have sustained use of decision aids? A programme evaluation for the Breast Cancer Initiative. *Health Expectations*. 2011 Mar;14 Suppl 1:85–95.
6. Légaré F, Ratté S, Stacey D, Kryworuchko J, Gravel K, Graham ID, et al. Interventions for improving the adoption of shared decision making by healthcare professionals. *Cochrane Database of Systematic Reviews*. 2010 Jan;(5):CD006732.
7. Coulter A. *Engaging Patients in Healthcare*. New York: Open University Press; 2011.
8. Wirmann E, Askham J. *Implementing patient decision aids in urology*. Oxford; 2006.
9. Garden J. Implementing an informed decision making programme for urology patients. *Journal of Communication in Healthcare*. 2008;1(3):297–310.
10. Frosch DL, Bhatnagar V, Tally S, Hamori CJ, Kaplan RM, Frosch DL, et al. Internet patient decision support: a randomized controlled trial comparing alternative approaches for men considering prostate cancer screening. *Archives of Internal Medicine [Internet]*. 2008 Feb;168(4):363–9. Available from: <http://search.ebscohost.com/login.aspx?direct=true&db=rzh&AN=2009869904&site=ehost-live;Publisher URL: www.cinahl.com/cgi-bin/refsvc?jid=690&accno=2009869904>
11. Hirsch O, Keller H, Krones T, Donner-Banzhoff N. Acceptance of shared decision making with reference to an electronic library of decision aids (arriba-lib) and its association to decision making in patients. An evaluation study. *Implementation Science [Internet]*. 2011 Jul 7 [cited 2011 Jul 25];6(1):70. Available from: <http://www.ncbi.nlm.nih.gov/pubmed/21736724>
12. Evans R, Elwyn G, Edward A, Newcombe R, Kinnersley P, Wright P, et al. A randomised controlled trial of the effects of a web-based PSA decision aid, Prosdex. *Protocol. BMC Family Practice*. 2007;8:58.

13. Holmes-Rovner MV, Valade D, Orlowski C, Draus C, Nabozny-Valerio B, Keiser S. Implementing shared decision-making in routine practice: Barriers and opportunities. *Health Expectations*. Blackwell Science Ltd; 2000;3(3):182–91.
14. Gravel K, Légaré F, Graham I. Barriers and facilitators to implementing shared decision-making in clinical practice: a systematic review of health professionals' perceptions. *Implementation Science*. 2006;1:16.
15. Elwyn G, Scholl I, Tietbohl C, Mann M, Edwards A, Clay K, et al. The implementation of patient decision support interventions into routine clinical practice: a systematic review. *Implementation Science*. 2012;In review.

Formatted: Font color: Auto



**Why clinicians don't refer patents to online decision support tools: interviews with front line providers in the NHS.**

|                                 |                                                                                                                                                                                                                                                                                                                                                                   |
|---------------------------------|-------------------------------------------------------------------------------------------------------------------------------------------------------------------------------------------------------------------------------------------------------------------------------------------------------------------------------------------------------------------|
| Journal:                        | <i>BMJ Open</i>                                                                                                                                                                                                                                                                                                                                                   |
| Manuscript ID:                  | bmjopen-2012-001530.R2                                                                                                                                                                                                                                                                                                                                            |
| Article Type:                   | Research                                                                                                                                                                                                                                                                                                                                                          |
| Date Submitted by the Author:   | 20-Oct-2012                                                                                                                                                                                                                                                                                                                                                       |
| Complete List of Authors:       | Elwyn, Glyn; Cardiff University, Cochrane Institute of Primary Care and Public Health<br>Rix, Andrew; Cardiff University, Cochrane Institute of Primary Care and Public Health<br>Holt, Tom; Cardiff University, Cochrane Institute of Primary Care and Public Health<br>Jones, Deborah; Cardiff University, Cochrane Institute of Primary Care and Public Health |
| <b>Primary Subject Heading</b>: | Evidence based practice                                                                                                                                                                                                                                                                                                                                           |
| Secondary Subject Heading:      | Communication, Evidence based practice, Health services research, Patient-centred medicine                                                                                                                                                                                                                                                                        |
| Keywords:                       | QUALITATIVE RESEARCH, Quality in health care < HEALTH SERVICES ADMINISTRATION & MANAGEMENT, Health service research, shared decision making, decision support interventions, patient decision aids                                                                                                                                                                |
|                                 |                                                                                                                                                                                                                                                                                                                                                                   |

SCHOLARONE™  
Manuscripts

only

# Why clinicians don't refer patents to online decision support tools? Interviews with front line clinics in the NHS.

Glyn Elwyn, Andrew Rix, Tom Holt, Deborah Jones

**Cochrane Institute of Primary Care and Public Health  
Neuadd Meirionydd  
School of Medicine  
Cardiff University  
Heath Park  
United Kingdom  
CF14 4YS**

Glyn Elwyn, professor, [elwyn@cardiff.ac.uk](mailto:elwyn@cardiff.ac.uk)

Andrew Rix, independent researcher, [andrewrixhome@gmail.com](mailto:andrewrixhome@gmail.com)

Tom Holt, independent researcher, [tbholt1@gmail.com](mailto:tbholt1@gmail.com)

Deborah Jones, independent researcher, [deb.jns64@gmail.com](mailto:deb.jns64@gmail.com)

**Address for correspondence:** Glyn Elwyn - [glynelwyn@gmail.com](mailto:glynelwyn@gmail.com)

**Keywords:** patient decision support, decision aids, shared decision making, patient centred care, informed consent.

The Corresponding Author has the right to grant on behalf of all authors and does grant on behalf of all authors, an exclusive licence (or non exclusive for government employees) on a worldwide basis to the BMJ Publishing Group Ltd to permit this article (if accepted) to be published in BMJ editions and any other BMJGL products and sublicences such use and exploit all subsidiary rights, as set out in our licence.

All authors have completed the Unified Competing Interest form [http://www.icmje.org/coi\\_disclosure.pdf](http://www.icmje.org/coi_disclosure.pdf) (available on request from the corresponding author) and declare: no support from any organisation for the submitted work [or describe if any]; no financial relationships with any organisations that might have an interest in the submitted work in the previous three years [or describe if any], no other relationships or activities that could appear to have influenced the submitted work [or describe if any].

## Summary

### Focus

- Research studies demonstrate that engaging patients in the use of decision support (decision aids) is beneficial but there are significant challenges to their implementation into practice
- Clinicians are in a position to advocate the use of patient decision support but do not appear to do so.

### Key messages

- Reluctance to refer patients to decision support is largely based on the scepticism of professionals that these tools add value, coupled with difficulties of incorporating the tools into existing workflows and competing organisational pressures, such as targets
- This reluctance will not be overcome simply by placing tools on the web
- When appropriately directed, a significant number of patients do use the decision support and say they find them useful.

### Strengths and Limitations

- The evaluation study upon which these results are based set out to explore patterns of usage but turned to examine why take up was lower than expected
- The evidence comes mainly from 57 qualitative interviews with healthcare professionals taking part in the introduction of six web-based decision support tools hosted on the NHS Direct website

**Abstract**

**Objective:** To assess whether clinical teams would direct patients to use web-based patient decision support interventions (DESI) and whether patients would use them.

**Design:** Retrospective semi-structured interviews and web server log analysis.

**Participants and settings:** 57 NHS professionals (nurses, doctors and others) in orthopaedic, antenatal, breast, urology clinics and in primary care practices across 22 NHS sites given access to DESIs hosted on the NHS Direct web-site.

**Results:** Fewer than expected patients were directed to use the web tools. The most significant obstacles to referral to the tools were the attitudes of clinicians and clinical teams. Technical problems contributed to the problems but the low uptake was mainly explained by clinicians' limited understanding of how patient DESIs could be helpful in clinical pathways, their perception that 'shared decision making' was already commonplace and that, in their view, some patients are resistant to being involved in treatment decisions. External factors, such as efficiency targets and 'best practice' recommendations were also cited being significant barriers. Clinicians did not feel the need to refer patients to use decision support tools, web-based or not, and, as a result, felt no requirement to change existing practice routines. Uptake is highest when clinicians set expectations that these tools are integral to practice and embed their use into clinical pathways.

**Conclusions:** Existing evidence of patient benefit and the free availability of patient DESIs via the web are not sufficient drivers to achieve routine use. Health professionals were not motivated to refer patients to these interventions. Clinicians will not use these interventions simply because they are made available, despite good evidence of benefit to patients. These attitudes are deep seated and will not be modified by solely developing web-based interventions: a broader strategy will be required to embed DESIs into routine practice.

**Words:** 284

**Article words:** 3153

## Introduction

Are clinical teams willing to ask patients to use decision support interventions, when hosted on the web? A decade of research has demonstrated consistent positive outcomes when patient decision support interventions, often called decision aids, are evaluated in randomised controlled trials (1). Use of these interventions is advocated in order to help achieve shared decision making – where patients and clinicians work together to arrive at decisions that best match the informed patient preference (2). These interventions typically consider clinical situations where there are reasonable alternatives. Typical examples are whether to proceed to a total knee replacement or use alternative treatments or whether to accept or decline an amniocentesis, a procedure that runs the risk of leading to a miscarriage. When these interventions are used, patient knowledge increases, risk perceptions are more accurate, patients feel more actively involved in decisions and often tend to make more conservative choices, especially when considering discretionary surgery (1).

Despite good evidence and increasing policy support, studies have revealed resistance to the implementation of shared decision making and decision support (3). Professionals often hold the view that they 'already do' shared decision making, that the interventions promoted lack applicability to individual patients and that there is insufficient time to involve patients in decisions (4). To date, only a few studies have addressed the use of implementing these interventions in routine clinical settings (5). Many obstacles have been described and it is too early to say whether the benefits observed in randomised trials can be replicated (6). As yet, there has been no large scale study to assess the uptake possible in pragmatic settings (7).

Responding to the potential benefits of shared decision making and the use of patient decision support, the NHS in England invested approximately £1.5M in 2009-10 creating a platform of web-based patient decision support, as part of an England-wide shared decision making programme. NHS Direct was commissioned by the East of England Strategic Health Authority to adapt, host and pilot the introduction of web-based decision support interventions into the NHS, as part of the Quality Innovation, Performance and Prevention Programme.

A multi-phase programme of work was proposed, with the aim of creating an easily accessed web-based set of patient decision support tools hosted on an NHS web-platform coupled with telephone support (2). An external evaluation was set up to assess whether clinical teams would direct patients to these tools and to assess uptake and use. This article reports on the attitudes of participating staff which lie behind the reluctance to refer patients to these tools.

## Methods

Two phases were planned. In each phase, three web interventions were adapted and hosted on NHS Direct's website. NHS sites were recruited into evaluation pilots of approximately three-month's duration – see Table 1.

In phase 1, the three interventions were adaptations of programmes originally developed by the Foundation for Informed Decision Making, Boston (see Table 1). The prostate web interventions were



originally produced in DVD versions and had been previously introduced into some clinics in England (8)(9).

Eight NHS clinics, across England, some with previous involvement in the development of the DVD and web-based versions, agreed to introduce patients to them. For the knee condition, patients referred to secondary care were identified by staff and directed to access the web-based tools to read information about a range of treatment options, e.g. physiotherapy, injections and knee replacement. If patients completed the use of the web tool, a personalised summary was generated that listed their preferred treatment. Patients were asked to either print this summary or, when they attended their next clinic appointment, to ask for the summary to be discussed with them. It had been estimated that 360 patients across three clinics would be eligible to use the knee osteoarthritis web intervention during the evaluation period. Similar methods were applied to the web tools for BHP and LPC.

In phase 2, three interventions were adapted from tools developed at Cardiff University (Table 1). Data was collected from 7 breast cancer and 7 antenatal outpatient clinics recruited by NHS Direct (Table 2). Estimates of patients potentially eligible for these tools had been set at 50 per site, a pool of around 700 patients. Primary Care Trusts in England were asked to contact primary care practices, alerting clinicians to the availability of the PSA decision support tool.

### Data Collection

Data was collected in each phase for a maximum of 14 weeks using the following methods:

*Referral data:* In both phases, clinics kept a record of patients directed to use the tools. Patients were given unique access codes, enabling anonymised tracking of server web logs.

*Web logs:* web server log data was collected, tracking access (content and duration) of each web page viewed.

*Interviews with health professionals:* After informed consent was obtained, semi-structured interviews were conducted with medical and nursing specialists responsible for implementing the intervention at each clinic. The respondents were asked their views about the web-based patient decision support and whether they had referred patients to them, we asked about the role they might play in their work. Interviews were conducted at the start, mid-point and end of the pilots, audio-recorded and transcribed. Results from the evaluation of the first phase led to a change of focus for the evaluation of the second phase.

*Data analysis:* Web server log data were verified, cleaned and analysed by TH. AR and DJ coded the interviews independently, meeting to agree coding frames, prior to jointly categorising the data into themes related to clinician views about the decision support tools and their willingness to direct patients to them.

### Results

*Patient's access and use:* Records indicate that 162 of the estimated potential pool of 360 patients were offered access to the OA knee tool: 102 of the 162 visited (63%) visited the site, at least briefly. A total of 38 (23%) provided some information; 27 patients (26%) used the site in sufficiently to produce a summary sheet that could be used in a future clinic appointment. This number represents 7% of those estimated to have been eligible. No estimates were available for eligible patients in relation to BPH and LPC, or for numbers directed to the sites. Web log data showed 24 and 8 unique visitors to the LPC

and BPH sites respectively, resulting in 5 and 2 patients using the sites from introductory pages to summary page, answering all questions.

To compensate for the unexpected access rates in phase one, the number of participating clinics planned for phase two was increased. Based on attendance rates, 700 patients had been considered eligible (50 at each of 14 clinics). The actual uptake was less than expected: 157 patients were directed to the amniocentesis web tool and 36 patients were directed to the breast cancer tool (data were only available from four of the seven breast clinics) (Table 2). Data about the number of patients directed to the PSA website from primary care were not available.

Table 2 also describes considerable variation between clinics in the number of patients who accessed the tool. Three of the antenatal clinics had access rates of 60% or higher; all the other antenatal clinics had access rates of 28% or lower. Having gained access, 26/54 (48%) patients viewed the amniocentesis site for 30 minutes or more, indicating significant levels of interest after overcoming the access hurdle. These data suggest that high proportion of patients will potentially access and use decision support tools: how best to motivate professionals to direct patients to these interventions is a challenge.

*Interviews with health professionals:* During phases 1 and 2, 57 interviews were conducted with health care professionals, across all sites, (see Table 3). Interviews in phase 2 focused on examining reasons for the unexpected low number of patients directed to use the decision support tools and what steps might be helpful in embedding patient decision support into routine practice. Analysis of the interviews revealed overall resistance to directing patients to use decision support. This resistance arose from existing professional attitudes and to barriers arising from current organisational routines. Box 1 illustrates the main themes found in the data:

#### Box 1 Summary of themes derived from the qualitative analysis

| Theme                                                                                                         | Summary                                                                                                                                                                                                                       |
|---------------------------------------------------------------------------------------------------------------|-------------------------------------------------------------------------------------------------------------------------------------------------------------------------------------------------------------------------------|
| <b>1. Limited motivation to use tools designed to support patients participate in decisions</b>               | Low motivation for the intended role of patient decision was encountered, as illustrated by uncertain deployment of the tools in clinical pathways and low uptake by patients                                                 |
| <b>2. 'We already do shared decision making'</b>                                                              | Strong perception that clinicians were already involving patients in decisions, therefore no perceived need to change or to adopt decision support by adapting pathways                                                       |
| <b>3. Perceived patients' barriers to involvement in decision making</b>                                      | Clinicians cited barriers such as technical access problems and often saw patients as those that did not want to be involved in shared decision making or as those they felt had already accessed information on the internet |
| <b>4. Organisational factors that reduce professionals' motivation to involve patients in decision making</b> | External efficiency targets and health professionals' views about the imperative of using effective treatments were significant barriers to introducing patient decision support tools                                        |

### Theme 1 Limited motivation to use tools designed to support patients participate in decisions

The majority of key professionals, specialists, nurses and managers, had been invited to brief introductions about the websites and had been sent an information pack. However, interviews revealed that many clinicians had not fully understood the intended role of the tools. Ideally, decision support tools should be used by patients when diagnosis and treatment options are confirmed. In urology, this is after urine flow dynamics or biopsies have provided a diagnosis; in knee clinics, this is after osteoarthritis has been confirmed as the likely cause of pain. However, many clinicians saw these tools as merely means for providing information and not as ways of engaging patients in discussions about treatment decisions. Clinicians reported being happy with: "... anything that makes the patient genuinely more knowledgeable ..." (orthopaedic surgeon, site 3, phase 1). However, the concept that patients should use these tools to engage in decisions was not widely understood: "Having a summary sheet is fine for the patient but don't expect me to use it ... it would interfere with what I do, although I can see it might lead to less questions – which is good" (orthopaedic surgeon, site 2, phase 1).

### Theme 2 'We already do shared decision making'

The interviews revealed a widely held belief that decisions were already shared with patients and that this was occurring without the need for patient decision support. As one nurse commented, "I don't know how much more they could be involved [in decisions]" (antenatal screening nurse, clinic 7). An antenatal specialist stated that: "... we moved away from the patriarchal ideal of telling people what to do 20 years ago" (specialist, clinic 7). Many clinicians espoused the view that: "... you wouldn't replace the time you spend with patients by giving them a decision tool ... and the shared decision making process ... isn't dependent on having this kind of tool" (breast care nurse, clinic 4).

### Theme 3 Perceived patient barriers to involvement in decision making

Patients' inability to access the Internet was often raised. "You wonder if they've got access, especially to broadband ..." (specialist nurse, site 4, phase 1) and that: "This generation are not used to getting information in this way" (specialist nurse, site 6, phase 1). Clinicians also gave examples of patients resisting involvement in decisions. A surgeon reported one woman saying, "I'll do whatever you say. You tell me to have a mastectomy, I'll have a mastectomy ..." (breast surgeon, clinic 4). A breast care nurse commented, "... most women... say 'you make the decision for me ... it's much easier if you tell me what I have to have done'" (breast care nurse, clinic 4). Patients were often categorised as either "sufficiently informed" or misinformed, "clutching internet printouts" (breast surgeon, clinic 3). The prevailing view among interviewees was to accept, that, "there is a role for your website but that cohort is very narrow ..." (breast surgeon, clinic 1).

### Theme 4 Organisational factors that reduce professionals' motivation to involve patients in decision making

External targets were often cited as barriers. Meeting efficiency targets, particularly in cancer, led to constant pressures. As a specialist explained, the constant pressure to "get to a decision" quickly means that clinicians do not "... want to encourage indecisive patients go off [to read a web tool], and then ... come back and see us for another consultation" (breast surgeon, clinic 1).

Many clinicians were explicit that they would not direct patients to tools that do not support their own views about effective treatments. For example, the breast cancer tool lists mastectomy and breast conservation surgery as treatments that should both be given consideration by women who have early

1  
2  
3 breast cancer. Yet, many clinics have a different ethos. As one surgeon stated: “*We obviously try to do*  
4 *breast conservation whenever we can. That’s the basic premise...*” (breast surgeon, clinic 1). This  
5 attitude is supported by external audits, where high mastectomy rates are viewed as inappropriate.  
6

7  
8 Routines were perceived as already being under pressure and so asking “... *a midwife to give*  
9 *[information about a web tool] was yet another thing ...*” (antenatal screening coordinator, clinic 1).  
10 Existing processes were viewed as being satisfactory: “*I would say that what we’re doing is actually*  
11 *fine*” (screening midwife, clinic 4) and that the website’s “*information does not make women’s decision*  
12 *about amniocentesis any easier*” (specialist, clinic 7). In short, it was felt that sufficient information was  
13 already available: most clinics did not see the websites as adding value to their work, and therefore saw  
14 no need for change. Nevertheless, three antenatal clinics achieved relatively high uptake rates, more  
15 importantly perhaps, access rates of 60% or higher (clinics 1, 6 and 7 – see Table 2). Interviews  
16 revealed that these three clinics had specifically modified their pathways and were alerting women by  
17 telephone about the tool at the same time as giving them their ‘high risk’ result and offer of  
18 amniocentesis. Women at clinic 7 were encouraged to access the website before attending their  
19 amniocentesis counselling session. Where the tools are integrated into routines, and expectations set  
20 that patients will use them before making decisions, different patterns of use emerge.  
21  
22

## 23 Discussion

24  
25 *Principal Findings:* This evaluation demonstrates that the implementation of patient decision support  
26 into routine practice is unlikely to be accomplished by the development of web-based tools alone: the  
27 relatively low uptake of the tools was explained by clinicians’ uncertainty about the content and also  
28 where exactly to position them in their clinical pathways, their perception that ‘shared decision making’  
29 was already commonplace in their teams. A minority also felt that patients, on the whole, are resistant  
30 to engaging in decisions. In addition, there was evidence that external factors, such as efficiency  
31 targets and ‘best practice’ recommendations, are viewed as have more influence in driving decisions  
32 than the informed preferences of patients.  
33  
34

35 In short, clinicians did not feel the need to direct patients to use decision support tools, web-based or  
36 not, and, as a result, felt no requirement to change existing routines. Taken together, these views  
37 represent significant barriers and explain why, in most of the clinics, few patients were directed to use  
38 the tools.  
39

40 It was encouraging however to notice that the data revealed that many patients, when directed to these  
41 tools, are willing to use them. Uptake is highest when clinicians set expectations that these tools are  
42 integral to practice and embed their use into clinical pathways.  
43  
44

45 *Strengths and weakness of methods:* The strengths of the study are the pragmatic use of routine NHS  
46 settings, the purposive sampling of those who had been actually tasked to introduce patients to these  
47 web-based decision support tools. The use of web server logs to track access provides direct data  
48 about the actual use of the tools. Constraints were placed on the intensity of the evaluation processes  
49 by the tight service delivery timetables set by the NHS sponsor.  
50

51 Although relevant clinicians were interviewed in all sites, the sample could have been expanded if more  
52 time had been available. Although the study sheds some light on some the implementation barriers,  
53 further work is needed into understand how to identify patients that would benefit from being asked to  
54 use decision support, i.e. to determine the eligible numbers in any given clinical pathway as a way of  
55 establishing the denominator population for assessing uptake.  
56  
57  
58  
59  
60

1  
2  
3 *Results in context of other similar work:* Previous work on web-based patient decision support  
4 interventions has been typically undertaken in the context of randomised trials (1) and so it is difficult to  
5 draw comparisons to this pragmatic implementation study. Nevertheless, existing research studies do  
6 illustrate high degrees of difficulty in recruiting patients to use web-based interventions, even with  
7 dedicated resources and incentives (10)(11)(12). Holmes Rovner documented a decade ago that  
8 engaging clinicians to direct patients to use decision support tools active participants was a significant  
9 barrier to implementation (13). Caldon also documented of the concerns and anxieties of health  
10 professionals about patient decision support, such as the threat to clinical autonomy, the fear of more  
11 demanding patients and suspicion that the content was did not accord with their personal practice (4).  
12 These findings are echoed by recent reviews (14)(6)(15).  
13  
14

15 *Implications:* As recently noted by Coulter (7), addressing the implementation challenge will require  
16 efforts targeted at changing hearts, minds and systems. More preparation and training might be helpful  
17 but future work will also need to work on achieving organisation-wide agreement about the role of these  
18 interventions and their location in clinical pathways.  
19  
20

21 **Funding and Ethical Approval:** NHS Direct were commissioned by the East of England Strategic Health Authority to adapt,  
22 host and evaluate the use of patient decision support in England. NHS Direct provided funding for the evaluation,  
23 considered the evaluation under their research governance process and given the service evaluation nature of the study,  
24 decided that ethical approval was not required. NHS Direct had no involvement in the drafting of this article.  
25

26 **Acknowledgements:** We acknowledge the support and advice of the following people. Marie Anne Durand, at the time  
27 Programme Manager of the UK SDM Programme, Steven Laitner, SDM Programme Lead, Nick Chapman, Chief Executive  
28 Officer NHS Direct and Shirley Large, Head of Research NHS Direct.  
29

30 **Contributorship:** GE and AR designed the evaluation; AR and DJ undertook the interviews and conducted the qualitative  
31 analysis. TH undertook the quantitative analysis of the web log data. GE drafted the manuscript and is the guarantor and all  
32 authors contributed to the writing and editing process.  
33

34 **Data sharing:** There is no additional data available.  
35

36 **Competing Interests:** There are no competing interests.  
37  
38  
39  
40  
41  
42  
43  
44  
45  
46  
47  
48  
49  
50  
51  
52  
53  
54  
55  
56  
57  
58  
59  
60



## References

1. Stacey D, Bennett C, Barry M, et al. Decision aids for people facing health treatment or screening decisions. *Cochrane Database of Systematic Reviews*. 2011;(10):CD001431.
2. Elwyn G, Coulter A, Laitner S, et al. Implementing shared decision making in the NHS. *BMJ*. 2010 Jan;341:c5146.
3. Légaré F, Ratté S, Gravel K, et al. Barriers and facilitators to implementing shared decision-making in clinical practice: update of a systematic review of health professionals' perceptions. *Patient Education and Counseling*. 2008 Dec;73(3):526–35.
4. Caldon L, Collins K, Reed M, et al. Clinicians' concerns about decision support interventions for patients facing breast cancer surgery options: understanding the challenge of implementing shared decision-making. *Health Expectations*. Blackwell Publishing Ltd; 2010;14(2):133–46.
5. Feibelmann S, Yang TS, Uzogara EE, et al. What does it take to have sustained use of decision aids? A programme evaluation for the Breast Cancer Initiative. *Health Expectations*. 2011 Mar;14 Suppl 1:85–95.
6. Légaré F, Ratté S, Stacey D, et al. Interventions for improving the adoption of shared decision making by healthcare professionals. *Cochrane Database of Systematic Reviews*. 2010 Jan;(5):CD006732.
7. Coulter A. *Engaging Patients in Healthcare*. New York: Open University Press; 2011.
8. Wirmann E, Askham J. *Implementing patient decision aids in urology*. Oxford; 2006.
9. Garden J. Implementing an informed decision making programme for urology patients. *Journal of Communication in Healthcare*. 2008;1(3):297–310.
10. Frosch DL, Bhatnagar V, Tally S, et al. Internet patient decision support: a randomized controlled trial comparing alternative approaches for men considering prostate cancer screening. *Archives of Internal Medicine [Internet]*. 2008 Feb;168(4):363–9. Available from: <http://search.ebscohost.com/login.aspx?direct=true&db=rzh&AN=2009869904&site=ehost-live;Publisher URL: www.cinahl.com/cgi-bin/refsvc?jid=690&accno=2009869904>
11. Hirsch O, Keller H, Krones T, et al. Acceptance of shared decision making with reference to an electronic library of decision aids (arriba-lib) and its association to decision making in patients. An evaluation study. *Implementation Science [Internet]*. 2011 Jul 7 [cited 2011 Jul 25];6(1):70. Available from: <http://www.ncbi.nlm.nih.gov/pubmed/21736724>
12. Evans R, Elwyn G, Edward A, et al. A randomised controlled trial of the effects of a web-based PSA decision aid, Prosdex. *Protocol. BMC Family Practice*. 2007;8:58.
13. Holmes-Rovner MV, Valade D, Orlowski C, et al. Implementing shared decision-making in routine practice: Barriers and opportunities. *Health Expectations*. Blackwell Science Ltd; 2000;3(3):182–91.

- 1  
2  
3 14. Gravel K, Légaré F, Graham I. Barriers and facilitators to implementing shared decision-making  
4 in clinical practice: a systematic review of health professionals' perceptions. Implementation  
5 Science. 2006;1:16.  
6  
7  
8 15. Elwyn G, Scholl I, Tietbohl C, et al. The implementation of patient decision support interventions  
9 into routine clinical practice: a systematic review. Implementation Science. 2012;In review.  
10  
11  
12  
13  
14  
15  
16  
17  
18  
19

20  
21 **Table 1 Web-based patient decision support hosted on NHS Direct**

22  
23  
24  
25  
26  
27  
28  
29  
30  
31  
32  
33  
34  
35  
36  
37  
38  
39  
40  
41  
42  
43  
44  
45  
46  
47  
48  
49  
50  
51  
52  
53  
54  
55  
56  
57  
58  
59  
60

| Phase 1                                                          | Reasonable options considered                                                         | Evaluation Period     |
|------------------------------------------------------------------|---------------------------------------------------------------------------------------|-----------------------|
| Osteoarthritis (OA) of the knee (Sites 1, 2 and 3)               | Pain management, lifestyle change, manual therapy, joint injections, knee replacement | June – August 2010    |
| Benign Prostatic Hyperplasia (BPH) (sites 4,5,6,7,8)             | Active monitoring, surgical approaches, medication                                    |                       |
| Localised Prostate Cancer (LPC) (sites 4,5,6,7,8)                | Active monitoring, surgical approaches, medication                                    |                       |
| <b>Phase 2</b>                                                   |                                                                                       |                       |
| Amniocentesis (based on AmnioDex) (16)                           | No test, amniocentesis, chorionic villus sampling                                     | February – April 2011 |
| Breast Cancer (based on BresDex) (17)                            | Breast conservation surgery (lumpectomy) or mastectomy                                |                       |
| Test for prostate specific antigen (PSA) (based on ProsDex) (12) | No test, PSA test                                                                     |                       |



Table 2 Patients use of the web-tools during phases 1 and 2

|                                                         | Number of patients directed | Number of patients accessing | Number using web tool for > 30 minutes |
|---------------------------------------------------------|-----------------------------|------------------------------|----------------------------------------|
| <b>Clinics in Phase 1 §</b>                             |                             |                              |                                        |
| Osteoarthritis (OA) of the knee, (Sites 1, 2 and 3)     | 162                         | 102 (63%)                    | 26 (16%)                               |
| Urology: Benign Prostatic Hyperplasia (sites 4,5,6,7,8) | Not known                   | 8                            | 2                                      |
| Urology: Localised Prostate Cancer (sites 4,5,6,7,8)    | Not known                   | 24                           | 5                                      |
| <b>Clinics in Phase 2</b>                               |                             |                              |                                        |
| 1 Amniocentesis                                         | 32                          | 20 (63%)                     | 11 (55%)                               |
| 2 Amniocentesis                                         | 25                          | 3 (12%)                      | 1 (33%)                                |
| 3 Amniocentesis                                         | 25                          | 3 (12%)                      | 1 (33%)                                |
| 4 Amniocentesis                                         | 32                          | 9 (28%)                      | 4 (44%)                                |
| 5 Amniocentesis                                         | 20                          | 3 (15%)                      | 1 (33%)                                |
| 6 Amniocentesis                                         | 10                          | 6 (60%)                      | 3 (50%)                                |
| 7 Amniocentesis                                         | 13                          | 10 (77%)                     | 5 (50%)                                |
| <b>All antenatal clinics</b>                            | <b>157</b>                  | <b>54/157 (34%)</b>          | <b>26/54 (48%)</b>                     |
| 1 Breast cancer                                         | 12                          | 1 (8%)                       | 1 (100%)                               |
| 2 Breast cancer                                         | 20                          | 0 (0%)                       | Not applicable                         |
| 3 Breast cancer                                         | 2                           | 0 (0%)                       | Not applicable                         |
| 4 Breast cancer                                         | 2                           | 0 (0%)                       | Not applicable                         |
| 5 Breast cancer                                         | Unknown                     | 2                            | 2 (100%)                               |
| 6 Breast cancer                                         | Unknown                     | 0                            | Not applicable                         |
| 7 Breast cancer                                         | Unknown                     | 1                            | 0 (0%)                                 |
| <b>All breast cancer clinics</b>                        | <b>36</b>                   | <b>4/36 (11%)</b>            | <b>3/4 (75%)</b>                       |

§ In phase 1, numbers are aggregated.

Table 3 Interviews undertaken for each intervention

| Intervention                 | Number healthcare professionals interviewed |
|------------------------------|---------------------------------------------|
| Osteoarthritis of the knee   | 6                                           |
| Benign Prostatic Hyperplasia | 4                                           |
| Localised Prostate Cancer    | 5                                           |
| Amniocentesis                | 19                                          |
| Breast Cancer                | 23                                          |
| Prostate Specific Antigen    | 0                                           |
| <b>Total</b>                 | <b>57</b>                                   |

1  
2  
3  
4  
5  
6  
7  
8  
9  
10  
11  
12  
13  
14  
15  
16  
17  
18  
19  
20  
21  
22  
23  
24  
25  
26  
27  
28  
29  
30  
31  
32  
33  
34  
35  
36  
37  
38  
39  
40  
41  
42  
43  
44  
45  
46  
47  
48  
49  
50  
51  
52  
53  
54  
55  
56  
57  
58  
59  
60

For peer review only

1  
2  
3  
4  
5  
6  
7 **Why don't NHS healthcare professionals/clinicians don't refer/recommend patents use to**  
8 **online/web-based decision support tools? Interviews from the front line clinics in the NHS front**  
9 **line.**

Formatted: Font color: Auto

10 Glyn Elwyn, Andrew Rix, Tom Holt, Deborah Jones

11  
12  
13  
14  
15 **Cochrane Institute of Primary Care and Public Health**  
16 **Neuadd Meirionydd**  
17 **School of Medicine**  
18 **Cardiff University**  
19 **Heath Park**  
20 **United Kingdom**  
21 **CF14 4YS**

22  
23 Glyn Elwyn, professor, [elwyng@cardiff.ac.uk](mailto:elwyng@cardiff.ac.uk)

24 Andrew Rix, independent researcher, [andrewrixhome@gmail.com](mailto:andrewrixhome@gmail.com)

25 Tom Holt, independent researcher, [tbholt1@gmail.com](mailto:tbholt1@gmail.com)

26 Deborah Jones, independent researcher, [deb.jns64@gmail.com](mailto:deb.jns64@gmail.com)

27  
28  
29 **Address for correspondence:** Glyn Elwyn - [glynelwyn@gmail.com](mailto:glynelwyn@gmail.com)

30  
31 **Keywords:** patient decision support, decision aids, shared decision making, patient centred care,  
32 informed consent.

33  
34 The Corresponding Author has the right to grant on behalf of all authors and does grant on behalf of all  
35 authors, an exclusive licence (or non exclusive for government employees) on a worldwide basis to the  
36 BMJ Publishing Group Ltd to permit this article (if accepted) to be published in BMJ editions and any  
37 other BMJ PGL products and sublicences such use and exploit all subsidiary rights, as set out in our  
licence.

38 All authors have completed the Unified Competing Interest form

39 [http://www.icmje.org/coi\\_disclosure.pdf](http://www.icmje.org/coi_disclosure.pdf) (available on request from the corresponding author) and  
40 declare: no support from any organisation for the submitted work [or describe if any]; no financial  
41 relationships with any organisations that might have an interest in the submitted work in the previous  
42 three years [or describe if any], no other relationships or activities that could appear to have influenced  
43 the submitted work [or describe if any].

Formatted: Font color: Auto

## Summary

### Focus

- Research studies demonstrate that engaging patients in the use of decision support (decision aids) is beneficial but ~~there are significant challenges to their implementation into practice~~ ~~take up is low~~
- Clinicians are in a position to advocate the use of ~~patient~~ decision support ~~by~~ but do not appear to do so.

### Key messages

- Reluctance to ~~point refer~~ patients ~~in the direction of~~ decision support is ~~largely~~ based on ~~the scepticism of a complex mixture of~~ professionals ~~that these tools add value, coupled with attitudes, difficulties in of~~ incorporating the tools into existing work ~~patterns flows~~ and competing organisational pressures, such as targets
- This reluctance will not be overcome simply by ~~making placing more~~ tools ~~available and more accessible on the web~~
- When appropriately directed, a significant number of patients do use the decision support and say they find them useful.

### Strengths and Limitations

- The evaluation study upon which these results are based set out to explore patterns of usage but turned to examine why take up was lower than expected
- ~~The evidence comes mainly from 57 qualitative interviews with healthcare professionals taking part in the introduction of six web-based decision support tools hosted on the NHS Direct website~~
- ~~Low take up reduced the opportunity to obtain evidence from patient users.~~

**Formatted:** Font: Arial Narrow, 12 pt

**Formatted:** List Paragraph, Bulleted + Level: 1 + Aligned at: 0.25" + Indent at: 0.5"

**Formatted:** Font color: Auto

1  
2  
3  
4  
5  
6  
7  
8  
9  
10  
11  
12  
13  
14  
15  
16  
17  
18  
19  
20  
21  
22  
23  
24  
25  
26  
27  
28  
29  
30  
31  
32  
33  
34  
35  
36  
37  
38  
39  
40  
41  
42  
43  
44  
45  
46  
47  
48  
49  
50  
51  
52  
53  
54  
55  
56  
57  
58  
59  
60

|

For peer review only



## Abstract

**Objective:** To assess whether clinical teams would direct patients to use web-based patient decision support interventions (DESIs) and whether patients would use them.

**Design:** ~~Mixed methods using concurrent and R~~retrospective semi-structured interviews and web server log analysis ~~and surveys~~.

**Participants and settings:** 57 NHS professionals (nurses, doctors and others) in orthopaedic, antenatal, breast, urology clinics and in primary care practices ~~and 10 patients~~ across 22 NHS sites given access to DESIs hosted on the NHS Direct web-site.

**Results:** Fewer than expected patients were directed to use the web tools. The most significant obstacles to referral to the tools were the attitudes of clinicians and clinical teams. Technical problems ~~partly~~ contributed to the problems but the low uptake was mainly explained by clinicians' limited understanding of how ~~patient they DESIs should could be helpful be located~~ in clinical pathways, their perception that 'shared decision making' was already commonplace and that in their view, some patients are resistant to being involved in treatment decisions. External factors, such as efficiency targets and 'best practice' recommendations were also cited as having a significant being significant barriers. negative influence on clinicians' decisions to refer. Clinicians did not feel the need to direct refer patients to use decision support tools, web-based or not, and, as a result, felt no requirement to change existing practice routines. ~~However, the data also showed that many patients, when directed to these tools, were willing to access and use them and found them helpful~~. Uptake is highest when clinicians set expectations that these tools are integral to practice and embed their use into clinical pathways.

**Conclusions:** ~~Existing~~ evidence of patient benefit and the free availability of from a Cochrane review and making patient DESIs freely available via the web are not sufficient drivers to guarantee achieve routine use. ~~Changes are needed in attitudes and skills as well as system support to reach organisation-wide agreement about the role of these interventions and their location in clinical pathways. Health professionals were not motivated to refer patients to these interventions. Clinicians will not use these interventions simply because they are made available, despite good evidence of benefit to patients. These attitudes are deep seated and will not be modified by solely developing web-based interventions: a broader strategy will be required to embed DESIs into routine practice.~~

**Words:** 284

**Article words:** 3153

Formatted: Font color: Auto

Formatted: Font color: Auto

## Introduction

Are clinical teams willing to ask patients to use decision support interventions, when hosted on the web? A decade of research has demonstrated consistent positive outcomes when patient decision support interventions, often called decision aids, are evaluated in randomised controlled trials (1). Use of these interventions is advocated in order to help achieve shared decision making – where patients and clinicians work together to arrive at decisions that best match the informed patient preference (2). These interventions typically consider clinical situations where there are reasonable alternatives. Typical examples are whether to proceed to a total knee replacement or use alternative treatments or whether to accept or decline an amniocentesis, a procedure that runs the risk of leading to a miscarriage. When these interventions are used, patient knowledge increases, risk perceptions are more accurate, patients feel more actively involved in decisions and often tend to make more conservative choices, especially when considering discretionary surgery (1).

Despite good evidence and **increasing** policy support, studies have revealed resistance to the implementation of shared decision making and decision support (3). Professionals often hold the view that they 'already do' shared decision making, that the interventions promoted lack applicability to individual patients and that there is insufficient time to involve patients in decisions (4). To date, only a few studies have addressed the use of implementing these interventions in routine clinical settings (5). Many obstacles have been described and it is too early to say whether the benefits observed in randomised trials can be replicated. (6) **(Francis Légaré et al., 2010)**. As yet, there has been no large scale study to assess the uptake possible in pragmatic settings (7).

Responding to the potential benefits of shared decision making and the use of patient decision support, the NHS in England invested approximately £1.5M in 2009-10 creating a platform of web-based patient decision support, as part of an England-wide shared decision making programme. NHS Direct was commissioned by the East of England Strategic Health Authority to adapt, host and pilot the introduction of web-based decision support interventions into the NHS, as part of the Quality Innovation, Performance and Prevention Programme.

A multi-phase programme of work was proposed, with the aim of creating an easily accessed web-based set of patient decision support tools hosted on an NHS web-platform coupled with telephone support (2). An external evaluation was set up to assess whether clinical teams would direct patients to these tools and to assess uptake and use. **This article reports on the attitudes of participating staff which lie behind the reluctance to refer patients to these tools. This article reports the main findings of the evaluation, based on web-server logs and interviews with clinical staff.**

Formatted: Font color: Auto, Highlight

Formatted: Font color: Auto

Formatted: Font color: Auto



## Methods

Two phases were planned. In each phase, three web interventions were adapted and hosted on NHS Direct's website. NHS sites were recruited into evaluation pilots of approximately three-month's duration – see Table 1.

In phase 1, the three interventions were adaptations of programmes originally developed by the Foundation for Informed Decision Making, Boston (see Table 1). The prostate web interventions were originally produced in DVD versions and had been previously introduced into some clinics in England (8)(9).

Eight NHS clinics, across England, some with previous involvement in the development of the DVD and web-based versions, agreed to introduce patients to them. For the knee condition, patients referred to secondary care were identified by staff ~~at the relevant clinics~~ and directed to access the web-based tools to read information about a range of treatment options, e.g. physiotherapy, injections and knee replacement. If patients completed the use of the web tool, a personalised summary was generated that listed their preferred treatment. Patients were asked to either print this summary or, when they attended their next clinic appointment, to ask for the summary to be discussed with them. It had been estimated that 360 patients across three clinics would be eligible to use the knee osteoarthritis web intervention during the evaluation period. Similar methods were applied to the web tools for BHP and LPC.

In phase 2, three interventions were adapted from tools developed at Cardiff University (~~see~~ Table 1). Data was collected from 7 breast cancer and 7 antenatal outpatient clinics recruited by NHS Direct (Table 2). Estimates of patients potentially eligible for these tools had been set at 50 per site, a pool of around 700 patients. Primary Care Trusts in England were asked to contact primary care practices, alerting clinicians to the availability of the PSA decision support tool.

## Data Collection

Data was collected in each phase for a maximum of 14 weeks using the following methods:

*Referral data:* In both phases, clinics kept a record of patients directed to use the tools. Patients were given unique access codes, enabling anonymised tracking of server web logs.

*Web logs:* web server log data was collected, tracking access (content and duration) of each web page viewed.

*Interviews with health professionals:* After informed consent was obtained, semi-structured interviews were conducted with medical and nursing specialists responsible for implementing the intervention at each clinic. The respondents were asked their views about the web-based patient decision support and whether they had referred patients to them, we asked about ~~the role they might play in their work.~~ Interviews were conducted at the start, mid-point and end of the pilots, audio-recorded and transcribed. Results from the evaluation of the first phase led to a change of focus for the evaluation of the second phase.

~~*Patient interviews and surveys:* Short survey tools addressed questions about usability and assessed knowledge about the relevant condition. Patients also consented to a semi-structured telephone interview about their experience of using the site.~~

Formatted: Font color: Auto

*Data analysis:* Web server log data were verified, cleaned and analysed by TH. AR and DJ coded the interviews independently, meeting to agree coding frames, prior to jointly categorising the data into themes related to clinician views about the decision support tools and their willingness to direct patients to them.

## Results

*Patient's access and use:* Records indicate that 162 of the estimated potential pool of 360 patients were offered access to the OA knee tool: 102 of the 162 visited (63%) visited the site, at least briefly. A total of 38 (23%) provided some information; 27 patients (26%) used the site in sufficiently to produce a summary sheet that could be used in a future clinic appointment. This number represents 7% of those estimated to have been eligible. No estimates were available for eligible patients in relation to BPH and LPC, or for numbers directed to the sites. Web log data showed 24 and 8 unique visitors to the LPC and BPH sites respectively, resulting in 5 and 2 patients using the sites from introductory pages to summary page, answering all questions.

To compensate for the unexpected access rates in phase one, the number of participating clinics planned for phase two was increased. Based on attendance rates, 700 patients had been considered eligible (50 at each of 14 clinics). The actual uptake was less than expected: 157 patients were directed to the amniocentesis web tool and 36 patients were directed to the breast cancer tool (data were only available from four of the seven breast clinics) (Table 2). Data about the number of patients directed to the PSA website from primary care were not available.

Table 2 also describes considerable variation between clinics in the number of patients who accessed the tool. Three of the antenatal clinics had access rates of 60% or higher; all the other antenatal clinics had access rates of 28% or lower. Having gained access, 26/54 (48%) patients viewed the amniocentesis site for 30 minutes or more, indicating significant levels of interest after overcoming the access hurdle. These data suggest that high proportion of patients will potentially access and use decision support tools: how best to motivate professionals to direct patients to these interventions is a challenge.

*Interviews with health professionals:* During phases 1 and 2, 57 interviews were conducted with health care professionals, across all sites, (see Table 3). Interviews in phase 2 focused on examining reasons for the unexpected low number of patients directed to use the decision support tools and what steps might be helpful in embedding patient decision support into routine practice. Analysis of the interviews revealed overall resistance to directing patients to use decision support. This resistance arose from existing professional attitudes and to barriers arising from current organisational routines. Box 1 illustrates the main themes found in the data:

### Box 1 Summary of themes derived from the qualitative analysis

| Theme                                                 | Summary                                                                                                                                                                                |
|-------------------------------------------------------|----------------------------------------------------------------------------------------------------------------------------------------------------------------------------------------|
| 1. Limited motivation to use patient decision support | Low motivation for the intended role of patient decision was encountered, as illustrated by uncertain deployment of the tools in clinical pathways and low uptake <i>by patients</i> . |
| 2. 'We already do shared decision making'             | Strong perception that clinicians were already involving patients in decisions, therefore no perceived need to change or to adopt decision support by adapting pathways                |
| 3. Perceived patients' barriers to                    | Clinicians cited barriers such as technical access problems                                                                                                                            |

Formatted: Font color: Auto

Formatted: Font color: Auto

Formatted: Font color: Auto, English (U.S.)

Formatted: Font color: Auto

Formatted: Font color: Auto

1  
2  
3  
4  
5  
6  
7  
8  
9  
10  
11  
12  
13  
14  
15  
16  
17  
18  
19  
20  
21  
22  
23  
24  
25  
26  
27  
28  
29  
30  
31  
32  
33  
34  
35  
36  
37  
38  
39  
40  
41  
42  
43  
44  
45  
46  
47  
48  
49  
50  
51  
52  
53  
54  
55  
56  
57  
58  
59  
60

|                                                                                 |                                                                                                                                                                   |
|---------------------------------------------------------------------------------|-------------------------------------------------------------------------------------------------------------------------------------------------------------------|
| involvement in decision making                                                  | and often saw patients as those that did not want to be involved in shared decision making or as those they felt had already accessed information on the internet |
| <b>4. Organisational resistance to patient's involvement in decision making</b> | External efficiency targets and health professionals' views about effective treatments were barriers                                                              |

Formatted: Font color: Auto

Formatted: Font color: Auto

For peer review only

### Theme 1 Limited motivation to use patient decision support

The majority of key professionals, specialists, nurses and managers, had been invited to brief introductions about the websites and had been sent an information pack. However, interviews revealed that many clinicians had not fully understood the intended role of the tools, ~~often ascribed to difficulty attending key meetings. Delays in the launch of the tools meant that professionals had not seen the websites, and were therefore uncertain about the content and also where exactly to position them in their clinical pathways.~~

Ideally, decision support tools should be used by patients when diagnosis and treatment options are confirmed. In urology, this is after urine flow dynamics or biopsies have provided a diagnosis; in knee clinics, this is after osteoarthritis has been confirmed as the likely cause of pain. However, many clinicians saw these tools as ~~merely means for providing information and not as ways of engaging patients in discussions about treatment discussionsdecisions, provided they did not disrupt clinical workflows.~~ Clinicians reported being happy with: "... anything that makes the patient genuinely more knowledgeable ..." (orthopaedic surgeon, site 3, phase 1). ~~However,~~ but the concept that patients should use these tools to engage in decisions was not widely understood: "Having a summary sheet is fine for the patient but don't expect me to use it ... it would interfere with what I do, although I can see it might lead to less questions – which is good" (orthopaedic surgeon, site 2, phase 1).

Formatted: Font color: Auto

Formatted: Font color: Auto

Formatted: Font color: Auto

Formatted: Font: Not Italic

Formatted: Font color: Auto

### Theme 2 'We already do shared decision making'

The interviews revealed a widely held belief that decisions were already shared with patients and that this was occurring without the need for patient decision support. As one nurse commented, "I don't know how much more they could be involved [in decisions]" (antenatal screening nurse, clinic 7). An antenatal specialist stated that: "... we moved away from the patriarchal ideal of telling people what to do 20 years ago" (specialist, clinic 7). Many clinicians espoused the view that: "... you wouldn't replace the time you spend with patients by giving them a decision tool ... and the shared decision making process ... isn't dependent on having this kind of tool" (breast care nurse, clinic 4).

### Theme 3 Perceived patient barriers to involvement in decision making

Patients' inability to access the Internet was often raised. "You wonder if they've got access, especially to broadband ..." (specialist nurse, site 4, phase 1) and that: "This generation are not used to getting information in this way" (specialist nurse, site 6, phase 1). Clinicians also gave examples of patients resisting involvement in decisions. A surgeon reported one woman saying, "I'll do whatever you say. You tell me to have a mastectomy, I'll have a mastectomy ..." (breast surgeon, clinic 4). A breast care nurse commented, "... most women... say 'you make the decision for me ... it's much easier if you tell me what I have to have done'" (breast care nurse, clinic 4). Patients were often categorised as either "sufficiently informed" or misinformed, "clutching internet printouts" (breast surgeon, clinic 3). The prevailing view among interviewees was to accept, that, "there is a role for your website but that cohort is very narrow ..." (breast surgeon, clinic 1).

### Theme 4 Organisational resistance to patient's involvement in decision making

External targets were often cited as barriers. Meeting efficiency targets, particularly in cancer, led to constant pressures. As a specialist explained, the constant pressure to "get to a decision" quickly means that clinicians do not "... want to encourage indecisive patients go off [to read a web tool], and then ... come back and see us for another consultation" (breast surgeon, clinic 1).

1  
2  
3  
4  
5  
6  
7  
8  
9  
10  
11  
12  
13  
14  
15  
16  
17  
18  
19  
20  
21  
22  
23  
24  
25  
26  
27  
28  
29  
30  
31  
32  
33  
34  
35  
36  
37  
38  
39  
40  
41  
42  
43  
44  
45  
46  
47  
48  
49  
50  
51  
52  
53  
54  
55  
56  
57  
58  
59  
60

Many clinicians were explicit that they would not direct patients to tools that do not support their own views about effective treatments. For example, the breast cancer tool lists mastectomy and breast conservation surgery as treatments that should both be given consideration by women who have early breast cancer. Yet, many clinics have a different ethos. As one surgeon stated: *"We obviously try to do breast conservation whenever we can. That's the basic premise..."* (breast surgeon, clinic 1). This attitude is supported by external audits, where high mastectomy rates are viewed as inappropriate.

Routines were perceived as already being under pressure and so asking *"... a midwife to give [information about a web tool] was yet another thing ..."* (antenatal screening coordinator, clinic 1). Existing processes were viewed as being satisfactory: *"I would say that what we're doing is actually fine"* (screening midwife, clinic 4) and that the website's *"information does not make women's decision about amniocentesis any easier"* (specialist, clinic 7). In short, it was felt that sufficient information was already available: most clinics did not see the websites as adding value to their work, and therefore saw no need for change. Nevertheless, three antenatal clinics achieved relatively high uptake rates, more importantly perhaps, access rates of 60% or higher (clinics 1, 6 and 7 – see Table 2). Interviews revealed that these three clinics had specifically modified their pathways and were alerting women by telephone about the tool at the same time as giving them their 'high risk' result and offer of amniocentesis. Women at clinic 7 were encouraged to access the website before attending their amniocentesis counselling session. Where the tools are integrated into routines, and expectations set that patients will use them before making decisions, different patterns of use emerge.

#### *Patient interviews and survey*

Ten patients in phase 1 volunteered for telephone interview (Table 3). These patients were positive about the balanced information about treatment options and were satisfied with the clarity of the website. Technical problems were confirmed. Patients also reported unmet expectations—that having become informed, it was disappointing to meet clinicians who were unwilling to involve them in decision making. In phase 1, 45 patients responded to the survey: 84% were very positive about the usefulness of the site, and 85% very positive about the ease of use, 76% were more positive about their upcoming outpatient appointment and 69% said that viewing had made a difference to their decision about treatment. In open comments, patients emphasised the advantage of being recommended high quality information that was available when it suited them, as one respondent said: *"...in my own time, in my own space and at my own pace"*. No volunteers for interviews or responses to surveys were received in phase 2.

#### **Discussion**

*Principal Findings:* This evaluation demonstrates that the implementation of patient decision support into routine practice is unlikely to be accomplished by the development of web-based tools alone: the relatively low uptake of the tools was explained by clinicians' uncertainty about the content and also where exactly to position them in their clinical pathways, their perception that 'shared decision making' was already commonplace in their teams. A minority also felt that patients, on the whole, are resistant to engaging in decisions. In addition, there was evidence that external factors, such as efficiency targets and 'best practice' recommendations, are viewed as have more influence in driving decisions than the informed preferences of patients.

In short, clinicians did not feel the need to direct patients to use decision support tools, web-based or not, and, as a result, felt no requirement to change existing routines. Taken together, these views represent significant barriers and explain why, in most of the clinics, few patients were directed to use the tools.

1  
2  
3  
4  
5  
6  
7 It was encouraging however to notice that the data revealed that many patients, when directed to these  
8 tools, are willing to use them, ~~and find them helpful~~. Uptake is highest when clinicians set expectations  
9 that these tools are integral to practice and embed their use into clinical pathways.

10  
11 *Strengths and weakness of methods:* The strengths of the study are the pragmatic use of routine NHS  
12 settings, the purposive sampling of those who had been **actually** tasked to introduce patients to these  
13 web-based decision support tools. ~~The, and the~~ use of web server logs to track access ~~so~~  
14 ~~that provides direct data about the~~ actual use of the tools ~~could be tracked~~. Constraints were placed on  
15 the ~~intensity of the~~ evaluation processes by the tight service delivery timetables ~~imposed set~~ by the  
16 NHS sponsor.

17 Although relevant clinicians were interviewed in all sites, the sample could have been expanded if more  
18 time had been available. ~~A weakness of the study is the lack of patient interviews in the second~~  
19 ~~evaluation phase, attributable to low uptake of the tools.~~ Although the study sheds some light on some  
20 the implementation barriers, further work is needed into understand how to identify patients that would  
21 benefit from being asked to use decision support, i.e. to determine the eligible numbers in any given  
22 clinical pathway as a way of establishing the denominator population for assessing uptake.

23  
24 *Results in context of other similar work:* Previous work on web-based patient decision support  
25 interventions has been typically undertaken in the context of randomised trials (1) and so it is difficult to  
26 draw comparisons to this pragmatic implementation study. Nevertheless, existing research studies do  
27 illustrate high degrees of difficulty in recruiting patients to use web-based interventions, even with  
28 dedicated resources and incentives (10)(11)(12). Holmes Rovner documented a decade ago that  
29 engaging clinicians to direct patients to use decision support tools active participants was a significant  
30 barrier to implementation (13). Caldon also documented of the concerns and anxieties of health  
31 professionals about patient decision support, such as the threat to clinical autonomy, the fear of more  
32 demanding patients and suspicion that the content was did not accord with their personal practice (4).  
33 These findings are echoed by recent reviews (14)(6)(15).

34  
35 *Implications:* As recently noted by Coulter (7), addressing the implementation challenge will require  
36 efforts targeted at changing hearts, minds and systems. More preparation and training might be helpful  
37 but future work will also need to work on achieving organisation-wide agreement about the role of these  
38 interventions and their location in clinical pathways.

39  
40 **Funding and Ethical Approval:** NHS Direct were commissioned by the East of England Strategic Health Authority to adapt,  
41 host and evaluate the use of patient decision support in England. NHS Direct provided funding for the evaluation,  
42 considered the evaluation under their research governance process and given the service evaluation nature of the study,  
43 decided that ethical approval was not required. NHS Direct had no involvement in the drafting of this article.

44  
45 **Acknowledgements:** We acknowledge the support and advice of the following people. Marie Anne Durand, at the time  
46 Programme Manager of the UK SDM Programme, Steven Laitner, SDM Programme Lead, Nick Chapman, Chief Executive  
47 Officer NHS Direct and Shirley Large, Head of Research NHS Direct.

48  
49 **Contributorship:** GE and AR designed the evaluation; AR and DJ undertook the interviews and conducted the qualitative  
50 analysis. TH undertook the quantitative analysis of the web log data. GE drafted the manuscript and is the guarantor and all  
51 authors contributed to the writing and editing process.

52  
53  
54  
55  
56  
57  
58  
59  
60  
**Data sharing:** There is no additional data available.

Formatted: Font color: Auto



## References

1. Stacey D, Bennett C, Barry M, Col N, Eden K, Holmes-Rovner M, et al. Decision aids for people facing health treatment or screening decisions. *Cochrane Database of Systematic Reviews*. 2011;(10):CD001431.
2. Elwyn G, Coulter A, Laitner S, Walker E, Watson P, Thomson R. Implementing shared decision making in the NHS. *BMJ*. 2010 Jan;341:c5146.
3. Légaré F, Ratté S, Gravel K, Graham ID. Barriers and facilitators to implementing shared decision-making in clinical practice: update of a systematic review of health professionals' perceptions. *Patient Education and Counseling*. 2008 Dec;73(3):526–35.
4. Caldon L, Collins K, Reed M, Sivell S, Austoker J, Clements A, et al. Clinicians' concerns about decision support interventions for patients facing breast cancer surgery options: understanding the challenge of implementing shared decision-making. *Health Expectations*. Blackwell Publishing Ltd; 2010;14(2):133–46.
5. Feibelman S, Yang TS, Uzogara EE, Sepucha K. What does it take to have sustained use of decision aids? A programme evaluation for the Breast Cancer Initiative. *Health Expectations*. 2011 Mar;14 Suppl 1:85–95.
6. Légaré F, Ratté S, Stacey D, Kryworuchko J, Gravel K, Graham ID, et al. Interventions for improving the adoption of shared decision making by healthcare professionals. *Cochrane Database of Systematic Reviews*. 2010 Jan;(5):CD006732.
7. Coulter A. *Engaging Patients in Healthcare*. New York: Open University Press; 2011.
8. Wirmann E, Askham J. *Implementing patient decision aids in urology*. Oxford; 2006.
9. Garden J. Implementing an informed decision making programme for urology patients. *Journal of Communication in Healthcare*. 2008;1(3):297–310.
10. Frosch DL, Bhatnagar V, Tally S, Hamori CJ, Kaplan RM, Frosch DL, et al. Internet patient decision support: a randomized controlled trial comparing alternative approaches for men considering prostate cancer screening. *Archives of Internal Medicine [Internet]*. 2008 Feb;168(4):363–9. Available from: <http://search.ebscohost.com/login.aspx?direct=true&db=rzh&AN=2009869904&site=ehost-live;Publisher URL: www.cinahl.com/cgi-bin/refsvc?jid=690&accno=2009869904>
11. Hirsch O, Keller H, Krones T, Donner-Banzhoff N. Acceptance of shared decision making with reference to an electronic library of decision aids (arriba-lib) and its association to decision making in patients. An evaluation study. *Implementation Science [Internet]*. 2011 Jul 7 [cited 2011 Jul 25];6(1):70. Available from: <http://www.ncbi.nlm.nih.gov/pubmed/21736724>
12. Evans R, Elwyn G, Edward A, Newcombe R, Kinnersley P, Wright P, et al. A randomised controlled trial of the effects of a web-based PSA decision aid, Prosdex. *Protocol. BMC Family Practice*. 2007;8:58.

1  
2  
3  
4  
5  
6  
7  
8  
9  
10  
11  
12  
13  
14  
15  
16  
17  
18  
19  
20  
21  
22  
23  
24  
25  
26  
27  
28  
29  
30  
31  
32  
33  
34  
35  
36  
37  
38  
39  
40  
41  
42  
43  
44  
45  
46  
47  
48  
49  
50  
51  
52  
53  
54  
55  
56  
57  
58  
59  
60

13. Holmes-Rovner MV, Valade D, Orlowski C, Draus C, Nabozny-Valerio B, Keiser S. Implementing shared decision-making in routine practice: Barriers and opportunities. *Health Expectations*. Blackwell Science Ltd; 2000;3(3):182–91.

14. Gravel K, Légaré F, Graham I. Barriers and facilitators to implementing shared decision-making in clinical practice: a systematic review of health professionals' perceptions. *Implementation Science*. 2006;1:16.

15. Elwyn G, Scholl I, Tietbohl C, Mann M, Edwards A, Clay K, et al. The implementation of patient decision support interventions into routine clinical practice: a systematic review. *Implementation Science*. 2012;In review.

Formatted: Font color: Auto

For peer review only
